# Supplementary material for: Palladium-catalyzed one-pot synthesis of 2-substituted quinazolin-4(3H)-ones from o-nitrobenzamide and alcohols
Source: Royal Society of Chemistry journal article supplement (doi:10.1039/d1ra01755a), 2021-01-01
Supplement: d1ra01755a1.pdf [file d1ra01755a1.pdf]

# Palladium-Catalyzed One-Pot Synthesis of 2-Substituted Quinazolin-4(3H)-ones from *o*-Nitrobenzamide and Alcohols

Ke Wang, Hao Chen, Xinyan Dai, Xupeng Huang and Zhiqiang Feng\*

---

*Beijing Key Laboratory of Active Substances Discovery and Druggability Evaluation, Institute of Materia Medica, Chinese Academy of Medical Sciences and Peking Union Medical College, No. 1 Xiannongtan Street, Beijing 100050, China.*

\* Correspondence: fengzhq@imm.ac.cn.

## Supplementary Data

| <b>Table of Contents</b>                                                      | <b>Page</b> |
|-------------------------------------------------------------------------------|-------------|
| 1. General Information                                                        | S2          |
| 2. General Procedure for the Preparation of the Target Compounds              | S2          |
| 3. Analytical Data of the Target Compounds                                    | S3          |
| 4. References                                                                 | S13         |
| 5. <sup>1</sup> H NMR and <sup>13</sup> C NMR Spectra of the Target Compounds | S14         |

## 1. General Information

All materials were purchased from commercial suppliers and used without further purification, if not stated otherwise. All reactions involving air-sensitive reagents were performed under an argon atmosphere. Melting points were determined on an INESA SGW<sub>R</sub> X-4A micro melting point apparatus and were uncorrected. <sup>1</sup>H NMR and <sup>13</sup>C NMR spectra were recorded on Varian Mercury 400 (1H, 400 MHz; 13C, 100 MHz) or Varian Mercury 500 (1H, 500 MHz; 13C, 125 MHz) spectrometers. Data for <sup>1</sup>H NMR are reported as follows: chemical shift ( $\delta$  ppm), multiplicity, integration, and coupling constant (Hz). Data for <sup>13</sup>C NMR are reported in terms of chemical shift ( $\delta$  ppm). The following abbreviations were used to describe peak splitting patterns when appropriate: s = singlet, d = doublet, t = triplet, m = multiplet. High-resolution mass spectra (HRMS) was recorded on a Thermo Exactive Plus spectrometer. The ionization method was ESI and the mass analyzer type was orbitrap.

## 2. General Procedure for the Preparation of the Target Compounds

A 10 mL sealed tube was charged with catalyst (0.1 mmol), *o*-nitrobenzamides (1 mmol), solvent (1-2 mL) and benzyl alcohol (2.5 mmol), and purged with argon three times. The reaction was then heated to 140 °C for 8 h. After cooling to room temperature, the solvent was removed under vacuum and the residue was purified by flash column chromatography on silica gel, using petroleum ether and EtOAc as eluent to afford the target compound.

### 3. Analytical Data of the Target Compounds

#### 2-phenylquinazolin-4(3H)-one (3a)<sup>1</sup>

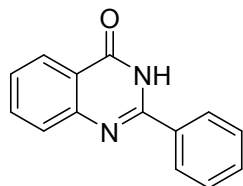

**White solid, Yield: 87%.**

<sup>1</sup>H NMR (400 MHz, DMSO-*d*<sub>6</sub>) δ 12.55 (s, 1H), 8.22 – 8.15 (m, 3H), 7.88 – 7.81 (m, 1H), 7.75 (d, *J* = 8.0 Hz, 1H), 7.63 – 7.50 (m, 4H). <sup>13</sup>C NMR (101 MHz, DMSO-*d*<sub>6</sub>) δ 162.3, 152.4, 148.8, 134.7, 132.8, 131.5, 128.7, 127.8, 127.6, 126.7, 125.9, 121.1. HRMS (ESI) calcd for C<sub>14</sub>H<sub>11</sub>N<sub>2</sub>O[M+H]<sup>+</sup> 223.0866, found 223.0866.

#### 2-(*o*-tolyl)quinazolin-4(3H)-one (3b)<sup>2</sup>

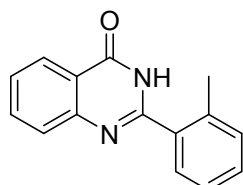

**White solid, Yield: 69%.**

<sup>1</sup>H NMR (400 MHz, DMSO-*d*<sub>6</sub>) δ 12.45 (s, 1H), 8.18 (dd, *J* = 7.9, 1.3 Hz, 1H), 7.94 – 7.78 (m, 1H), 7.70 (d, *J* = 7.9 Hz, 1H), 7.59 – 7.49 (m, 2H), 7.44 (td, *J* = 7.5, 1.3 Hz, 1H), 7.39 – 7.30 (m, 2H), 2.39 (s, 3H). <sup>13</sup>C NMR (101 MHz, DMSO-*d*<sub>6</sub>) δ 162.2, 154.8, 149.2, 136.6, 134.9, 134.7, 131.0, 130.3, 129.6, 127.8, 127.1, 126.2, 126.1, 121.4, 20.0. HRMS (ESI) calcd for C<sub>15</sub>H<sub>13</sub>N<sub>2</sub>O[M+H]<sup>+</sup> 237.1022, found 237.1028.

#### 2-(*m*-tolyl)quinazolin-4(3H)-one (3c)<sup>2</sup>

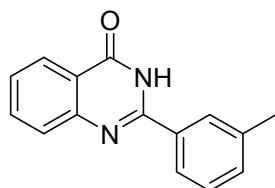

**White solid, Yield: 80%.**

<sup>1</sup>H NMR (400 MHz, DMSO-*d*<sub>6</sub>) δ 12.47 (s, 1H), 8.16 (d, *J* = 7.9 Hz, 1H), 8.03 (s, 1H), 7.98 (d, *J* = 7.3 Hz, 1H), 7.84 (t, *J* = 7.9 Hz, 1H), 7.75 (d, *J* = 8.1 Hz, 1H), 7.56 – 7.49 (m, 1H), 7.46 – 7.40 (m, 2H), 2.42 (s, 3H). <sup>13</sup>C NMR (101 MHz, DMSO-*d*<sub>6</sub>) δ 162.3, 152.5, 148.8, 138.0, 134.7, 132.7, 132.1, 128.6, 128.4, 127.6, 126.6, 125.9, 125.0, 121.1, 21.1. HRMS (ESI) calcd for C<sub>15</sub>H<sub>13</sub>N<sub>2</sub>O[M+H]<sup>+</sup> 237.1022, found 237.1028.

#### 2-(*p*-tolyl)quinazolin-4(3H)-one (3d)<sup>2</sup>

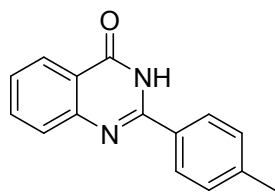

**White solid, Yield: 78%.**

$^1\text{H}$  NMR (400 MHz, DMSO- $d_6$ )  $\delta$  12.47 (s, 1H), 8.16 (dd,  $J = 7.9, 1.5$  Hz, 1H), 8.04 (s, 1H), 7.98 (d,  $J = 7.9$ , 1H), 7.87 – 7.81 (m, 1H), 7.75 (d,  $J = 8.0$  Hz, 1H), 7.55 – 7.51 (m, 1H), 7.36–7.40 (m, 2H), 2.42 (s, 3H).  $^{13}\text{C}$  NMR (101 MHz, DMSO- $d_6$ )  $\delta$  162.3, 152.4, 148.8, 138.0, 134.6, 132.7, 132.1, 128.6, 128.4, 127.6, 126.6, 125.9, 125.0, 121.1, 21.0. HRMS (ESI) calcd for  $\text{C}_{15}\text{H}_{13}\text{N}_2\text{O}[\text{M}+\text{H}]^+$  237.1022, found 237.1019.

**2-(2-fluorophenyl)quinazolin-4(3H)-one (3e)<sup>3</sup>**

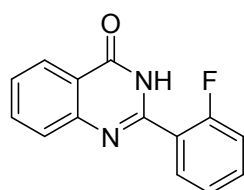

**White solid, Yield: 46%.**

$^1\text{H}$  NMR (500 MHz, DMSO- $d_6$ )  $\delta$  12.61 (s, 1H), 8.19 (dd,  $J = 8.0, 1.6$  Hz, 1H), 7.89–7.85 (m, 1H), 7.80 (td,  $J = 7.5, 1.8$  Hz, 1H), 7.75 (dd,  $J = 8.2, 1.1$  Hz, 1H), 7.66–7.62 (m, 1H), 7.60–7.56 (m, 1H), 7.45 – 7.34 (m, 2H).  $^{13}\text{C}$  NMR (126 MHz, DMSO- $d_6$ )  $\delta$  161.6, 159.7 (d,  $J = 250.8$  Hz), 150.1, 148.8, 134.8, 133.0 (d,  $J = 8.7$  Hz), 131.2, 127.6, 127.2, 126.0, 124.8 (d,  $J = 3.4$  Hz), 122.3 (d,  $J = 13.0$  Hz), 121.2, 116.2 (d,  $J = 21.3$  Hz). HRMS (ESI) calcd for  $\text{C}_{14}\text{H}_{10}\text{N}_2\text{OF}[\text{M}+\text{H}]^+$  241.0772, found 241.0770.

**2-(3-fluorophenyl)quinazolin-4(3H)-one (3f)<sup>3</sup>**

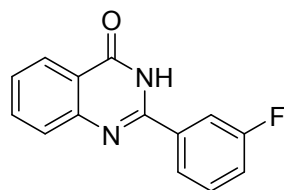

**White solid, Yield: 82%.**

$^1\text{H}$  NMR (400 MHz, DMSO- $d_6$ )  $\delta$  12.61 (s, 1H), 8.17 (d,  $J = 7.9$  Hz, 1H), 8.07 (d,  $J = 8.1$  Hz, 1H), 8.02 (d,  $J = 10.4$  Hz, 1H), 7.90 – 7.81 (m, 1H), 7.77 (d,  $J = 8.1$  Hz, 1H), 7.64–7.53 (m, 2H), 7.48–7.43 (m, 1H).  $^{13}\text{C}$  NMR (126 MHz, DMSO- $d_6$ )  $\delta$  162.2, 162.2 (d,  $J = 244.2$  Hz), 151.1, 148.6, 135.1 (d,  $J = 8.1$  Hz), 134.8, 130.9 (d,  $J = 8.3$  Hz), 127.7, 127.1, 126.0, 124.1, 121.2, 118.3 (d,  $J = 21.1$  Hz), 114.7 (d,  $J = 24.0$  Hz). HRMS (ESI) calcd for  $\text{C}_{14}\text{H}_{10}\text{N}_2\text{OF}[\text{M}+\text{H}]^+$  241.0772, found 241.0769.

**2-(4-fluorophenyl)quinazolin-4(3H)-one (3g)<sup>2</sup>**

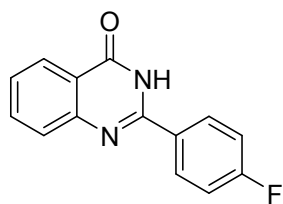

**White solid, Yield: 82%.**

$^1\text{H}$  NMR (400 MHz,  $\text{DMSO-}d_6$ )  $\delta$  12.58 (s, 1H), 8.30 – 8.23 (m, 2H), 8.16 (dd,  $J = 7.9$ , 1.2 Hz, 1H), 7.85 (td,  $J = 7.8$ , 7.2, 1.5 Hz, 1H), 7.74 (d,  $J = 7.8$  Hz, 1H), 7.57 – 7.50 (m, 1H), 7.44 – 7.36 (m, 2H).  $^{13}\text{C}$  NMR (101 MHz,  $\text{DMSO-}d_6$ )  $\delta$  164.1 (d,  $J = 250.4$  Hz), 162.3, 151.4, 148.7, 134.7, 130.4 (d,  $J = 9.1$  Hz), 129.3 (d,  $J = 2.9$  Hz), 127.5, 126.7, 125.9, 121.0, 115.7 (d,  $J = 22.0$  Hz). HRMS (ESI) calcd for  $\text{C}_{14}\text{H}_{10}\text{N}_2\text{OF}[\text{M}+\text{H}]^+$  241.0772, found 241.0771.

### 2-(3-methoxyphenyl)quinazolin-4(3H)-one (3h)<sup>2</sup>

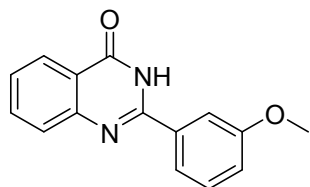

**White solid, Yield: 76%.**

$^1\text{H}$  NMR (400 MHz,  $\text{DMSO-}d_6$ )  $\delta$  12.55 (s, 1H), 8.17 (dd,  $J = 7.9$ , 1.2 Hz, 1H), 7.88 – 7.73 (m, 4H), 7.57 – 7.51 (m, 1H), 7.47 (t,  $J = 8.0$  Hz, 1H), 7.16 (dd,  $J = 8.1$ , 2.2 Hz, 1H), 3.88 (s, 3H).  $^{13}\text{C}$  NMR (101 MHz,  $\text{DMSO-}d_6$ )  $\delta$  162.3, 159.4, 152.1, 148.7, 134.7, 134.1, 129.8, 127.6, 126.7, 125.9, 121.1, 120.2, 117.7, 112.6, 55.5. HRMS (ESI) calcd for  $\text{C}_{15}\text{H}_{13}\text{N}_2\text{O}_2[\text{M}+\text{H}]^+$  253.0972, found 253.0978.

### 2-(4-methoxyphenyl)quinazolin-4(3H)-one (3i)<sup>2</sup>

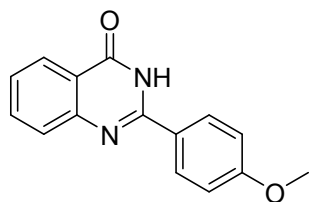

**White solid, Yield: 75%.**

$^1\text{H}$  NMR (400 MHz,  $\text{DMSO-}d_6$ )  $\delta$  12.42 (s, 1H), 8.21 (d,  $J = 8.9$  Hz, 2H), 8.15 (d,  $J = 7.4$  Hz, 1H), 7.82 (t,  $J = 7.6$  Hz, 1H), 7.71 (d,  $J = 8.0$  Hz, 1H), 7.49 (t,  $J = 7.2$  Hz, 1H), 7.10 (d,  $J = 8.8$  Hz, 2H), 3.86 (s, 3H).  $^{13}\text{C}$  NMR (101 MHz,  $\text{DMSO-}d_6$ )  $\delta$  162.3, 161.9, 151.9, 148.9, 134.5, 129.5, 127.3, 126.1, 125.8, 124.8, 120.7, 114.0, 55.5. HRMS (ESI) calcd for  $\text{C}_{15}\text{H}_{13}\text{N}_2\text{O}_2[\text{M}+\text{H}]^+$  253.0972, found 253.0968.

### 2-(2-chlorophenyl)quinazolin-4(3H)-one (3j)<sup>2</sup>

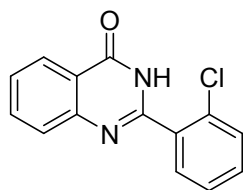

**White solid, Yield: 60%.**

$^1\text{H}$  NMR (400 MHz,  $\text{DMSO-}d_6$ )  $\delta$  12.63 (s, 1H), 8.18 (dd,  $J = 7.9, 1.4$  Hz, 1H), 7.86 (dt,  $J = 7.8, 1.5$  Hz, 1H), 7.75 – 7.65 (m, 2H), 7.65 – 7.53 (m, 3H), 7.50 (dt,  $J = 7.4, 1.3$  Hz, 1H).  $^{13}\text{C}$  NMR (101 MHz,  $\text{DMSO-}d_6$ )  $\delta$  161.5, 152.3, 148.8, 134.7, 133.9, 131.7, 131.5, 131.0, 129.7, 127.5, 127.3, 127.2, 125.9, 121.3. HRMS (ESI) calcd for  $\text{C}_{14}\text{H}_{10}\text{N}_2\text{OCl}[\text{M}+\text{H}]^+$  257.0476, found 257.0478.

### 2-(4-chlorophenyl)quinazolin-4(3H)-one (3k)<sup>2</sup>

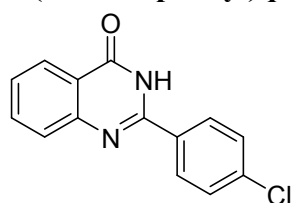

**White solid, Yield: 73%.**

$^1\text{H}$  NMR (400 MHz,  $\text{DMSO-}d_6$ )  $\delta$  12.61 (s, 1H), 8.21 (d,  $J = 8.3$  Hz, 2H), 8.16 (d,  $J = 7.8$  Hz, 1H), 7.84 (d,  $J = 7.8$  Hz, 1H), 7.75 (d,  $J = 8.1$  Hz, 1H), 7.63 (d,  $J = 8.2$  Hz, 2H), 7.55 (d,  $J = 7.9$  Hz, 1H).  $^{13}\text{C}$  NMR (101 MHz,  $\text{DMSO-}d_6$ )  $\delta$  162.3, 152.4, 148.6, 136.4, 134.8, 131.6, 129.7, 128.8, 127.6, 126.9, 126.0, 121.1. HRMS (ESI) calcd for  $\text{C}_{14}\text{H}_{10}\text{N}_2\text{OCl}[\text{M}+\text{H}]^+$  257.0476, found 257.0476.

### 2-(4-(trifluoromethyl)phenyl)quinazolin-4(3H)-one (3l)<sup>4</sup>

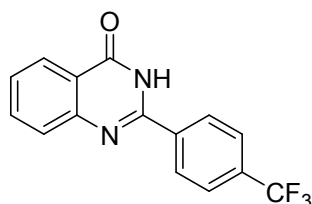

**White solid, Yield: 76%.**

$^1\text{H}$  NMR (400 MHz,  $\text{DMSO-}d_6$ )  $\delta$  12.36 (s, 1H), 8.23-8.17 (m, 3H), 7.63-7.51 (m, 4H), 7.39 (t,  $J = 7.0$  Hz, 1H).  $^{13}\text{C}$  NMR (101 MHz,  $\text{DMSO-}d_6$ )  $\delta$  162.1, 151.1, 148.4, 136.6, 134.7, 131.1 (q,  $J = 35.0$  Hz), 128.7, 127.6, 127.1, 125.9, 125.5 (q,  $J = 3.5$  Hz), 123.9 (q,  $J = 270.8$  Hz), 121.2. HRMS (ESI) calcd for  $\text{C}_{15}\text{H}_{10}\text{N}_2\text{OF}_3[\text{M}+\text{H}]^+$  291.0740, found 291.0731.

### 2-(thiophen-2-yl)quinazolin-4(3H)-one (3m)<sup>2</sup>

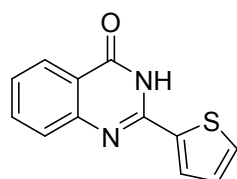

**White solid, Yield: 66%.**

$^1\text{H}$  NMR (500 MHz,  $\text{DMSO-}d_6$ )  $\delta$  12.66 (s, 1H), 8.24 (d,  $J = 3.8$  Hz, 1H), 8.16 – 8.10 (m, 1H), 7.88 (d,  $J = 5.0$  Hz, 1H), 7.85 – 7.77 (m, 1H), 7.66 (d,  $J = 8.2$  Hz, 1H), 7.49 (t,  $J = 7.5$  Hz, 1H), 7.24 (t,  $J = 4.4$  Hz, 1H).  $^{13}\text{C}$  NMR (101 MHz,  $\text{DMSO-}d_6$ )  $\delta$  161.9, 148.7, 147.9, 137.4, 134.8, 132.3, 129.5, 128.6, 127.0, 126.4, 126.1, 121.0. HRMS (ESI) calcd for  $\text{C}_{12}\text{H}_9\text{N}_3\text{OS}[\text{M}+\text{H}]^+$  229.0430, found 229.0428.

**2-(6-methylpyridin-2-yl)quinazolin-4(3H)-one (3n)<sup>5</sup>**

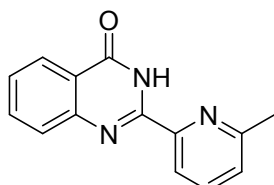

**White solid, Yield: 83%.**

$^1\text{H}$  NMR (400 MHz,  $\text{DMSO-}d_6$ )  $\delta$  11.65 (s, 1H), 8.25 (d,  $J = 7.8$  Hz, 1H), 8.19 (d,  $J = 7.8$  Hz, 1H), 7.95 (t,  $J = 7.8$  Hz, 1H), 7.88 (t,  $J = 8.1$  Hz, 1H), 7.80 (d,  $J = 8.1$  Hz, 1H), 7.57 (t,  $J = 7.8$  Hz, 1H), 7.51 (d,  $J = 7.7$  Hz, 1H), 2.63 (s, 3H).  $^{13}\text{C}$  NMR (101 MHz,  $\text{DMSO-}d_6$ )  $\delta$  160.8, 157.9, 150.0, 148.6, 147.7, 138.2, 134.8, 127.8, 127.3, 126.2, 122.1, 119.2, 23.8. HRMS (ESI) calcd for  $\text{C}_{14}\text{H}_{12}\text{N}_3\text{O}[\text{M}+\text{H}]^+$  238.0975, found 238.0989.

**2-(pyridin-3-yl)quinazolin-4(3H)-one<sup>2</sup> (3o)<sup>4</sup>**

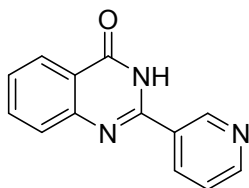

**White solid, Yield: 54%.**

$^1\text{H}$  NMR (400 MHz,  $\text{DMSO-}d_6$ )  $\delta$  12.74 (s, 1H), 9.30 (d,  $J = 1.8$  Hz, 1H), 8.76 (dd,  $J = 4.8, 1.5$  Hz, 1H), 8.50 (dt,  $J = 8.2, 1.8$  Hz, 1H), 8.18 (d,  $J = 8.7$  Hz, 1H), 7.89 – 7.85 (m, 1H), 7.77 (d,  $J = 7.9$  Hz, 1H), 7.61 – 7.54 (m, 2H).  $^{13}\text{C}$  NMR (101 MHz,  $\text{DMSO-}d_6$ )  $\delta$  162.2, 151.9, 150.8, 149.8, 148.6, 135.5, 134.8, 127.7, 127.0, 126.0, 123.6, 121.2. HRMS (ESI) calcd for  $\text{C}_{13}\text{H}_{10}\text{N}_3\text{O}[\text{M}+\text{H}]^+$  224.0818, found 224.0815.

**2-(pyridin-4-yl)quinazolin-4(3H)-one (3p)<sup>3</sup>**

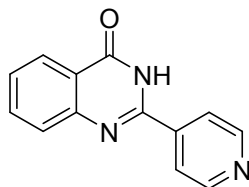

**White solid, Yield: 48%.**

$^1\text{H}$  NMR (400 MHz,  $\text{DMSO-}d_6$ )  $\delta$  12.76 (s, 1H), 8.78 (d,  $J = 6.0$  Hz, 2H), 8.18 (d,  $J = 7.9$  Hz, 1H), 8.11 (d,  $J = 6.0$  Hz, 2H), 7.89 - 7.85 (m, 1H), 7.79 (d,  $J = 8.2$  Hz, 1H), 7.61 – 7.54 (m, 1H).  $^{13}\text{C}$  NMR (101 MHz,  $\text{DMSO-}d_6$ )  $\delta$  162.1, 150.6, 150.3, 148.3,

140.0 , 134.9 , 127.9 , 127.5 , 126.0 , 121.7 , 121.6 . HRMS (ESI) calcd for  $C_{13}H_{10}N_3O[M+H]^+$  224.0818, found 224.0811.

### 2-(thiazol-5-yl)quinazolin-4(3H)-one (3q)

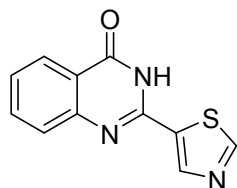

**White solid, Yield: 78%, mp 293-294°C**

$^1H$  NMR (400 MHz, DMSO- $d_6$ )  $\delta$  12.87 (s, 1H), 9.32 (s, 1H), 8.91 (s, 1H), 8.14 (d,  $J$  = 7.9 Hz, 1H), 7.83 (t,  $J$  = 6.5 Hz, 1H), 7.68 (d,  $J$  = 8.3 Hz, 1H), 7.53 (t,  $J$  = 7.1 Hz, 1H).  $^{13}C$  NMR (101 MHz, DMSO- $d_6$ )  $\delta$  161.7 , 159.1 , 148.5 , 146.5 , 144.5 , 134.9 , 133.9 , 127.2 , 127.0 , 126.1 , 121.1 . HRMS (ESI) calcd for  $C_{11}H_8N_3OS[M+H]^+$  230.0383, found 230.0380.

### 2-cyclohexylquinazolin-4(3H)-one (3r)<sup>6</sup>

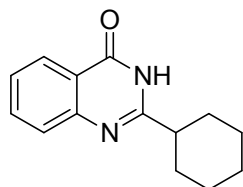

**White solid, Yield: 64%.**

$^1H$  NMR (400 MHz, DMSO- $d_6$ )  $\delta$  12.09 (s, 1H), 8.09 (d,  $J$  = 7.8 Hz, 1H), 7.77 (t,  $J$  = 7.7 Hz, 1H), 7.60 (d,  $J$  = 8.2 Hz, 1H), 7.46 (t,  $J$  = 7.5 Hz, 1H), 2.58 (t,  $J$  = 11.7 Hz, 1H), 1.91 (d,  $J$  = 12.1 Hz, 2H), 1.80 (d,  $J$  = 12.2 Hz, 2H), 1.72 – 1.51 (m, 3H), 1.38 – 1.19 (m, 3H).  $^{13}C$  NMR (101 MHz, DMSO- $d_6$ )  $\delta$  162.0 , 160.8 , 149.0 , 134.3 , 127.0 , 126.0 , 125.72 , 121.0 , 32.9 , 30.3 , 25.6 , 25.4 . HRMS (ESI) calcd for  $C_{14}H_{17}N_2O[M+H]^+$  229.1335, found 229.1334.

### 2-propylquinazolin-4(3H)-one (3s)<sup>3</sup>

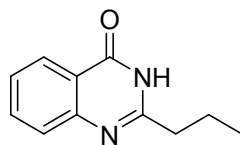

**White solid, Yield: 31%.**

$^1H$  NMR (400 MHz, DMSO- $d_6$ )  $\delta$  12.16 (s, 1H), 8.08 (d,  $J$  = 7.8 Hz, 1H), 7.77 (t,  $J$  = 7.9 Hz, 1H), 7.60 (d,  $J$  = 8.2 Hz, 1H), 7.46 (t,  $J$  = 7.5 Hz, 1H), 2.58 (t,  $J$  = 7.6 Hz, 2H), 1.80 - 1.70 (m, 2H), 0.94 (t,  $J$  = 7.4 Hz, 3H).  $^{13}C$  NMR (101 MHz, DMSO- $d_6$ )  $\delta$  161.7 , 157.2 , 148.9 , 134.2 , 126.7 , 125.8 , 125.6 , 120.7 , 36.3 , 20.1 , 13.4 . HRMS (ESI) calcd for  $C_{11}H_{13}N_2O[M+H]^+$  189.1022, found 189.1019.

### 2-pentylquinazolin-4(3H)-one (3t)<sup>6</sup>



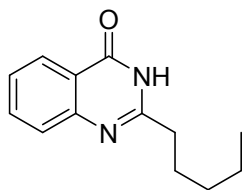

**White solid, Yield: 42%.**

$^1\text{H}$  NMR (400 MHz,  $\text{DMSO-}d_6$ )  $\delta$  12.16 (s, 1H), 8.08 (dd,  $J = 7.9, 1.5$  Hz, 1H), 7.78-7.74 (m, 1H), 7.59 (d,  $J = 8.0$ , 1H), 7.49 – 7.38 (m, 1H), 2.59 (t,  $J = 7.5$ , 2H), 1.76 - 1.68 (m, 2H), 1.33 - 1.26 (m, 4H), 0.86 (t,  $J = 6.8$ , 3H).  $^{13}\text{C}$  NMR (101 MHz,  $\text{DMSO-}d_6$ )  $\delta$  161.9, 157.6, 149.0, 134.3, 126.9, 125.9, 125.7, 120.8, 34.5, 30.8, 26.6, 21.9, 13.9. HRMS (ESI) calcd for  $\text{C}_{13}\text{H}_{17}\text{N}_2\text{O}$ [ $\text{M}+\text{H}$ ] $^+$  217.1335, found 217.1331.

### 2-(5-hydroxypentyl)quinazolin-4(3H)-one (3u)

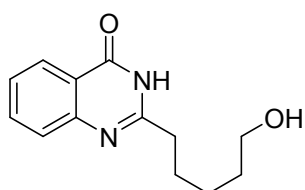

**White solid, Yield: 48%, mp 152-153 °C.**

$^1\text{H}$  NMR (500 MHz,  $\text{DMSO-}d_6$ )  $\delta$  12.16 (s, 1H), 8.08 (d,  $J = 7.9$  Hz, 1H), 7.77 (t,  $J = 7.7$  Hz, 1H), 7.59 (d,  $J = 8.2$  Hz, 1H), 7.45 (t,  $J = 7.5$  Hz, 1H), 4.35 (t,  $J = 5.2$  Hz, 1H), 3.41 - 3.37 (m, 2H), 2.60 (t,  $J = 6.0$  Hz, 2H), 1.76 - 1.69 (m, 2H), 1.48 - 1.43 (m, 2H), 1.38 - 1.32 (m, 2H).  $^{13}\text{C}$  NMR (101 MHz,  $\text{DMSO-}d_6$ )  $\delta$  162.3, 158.0, 149.5, 134.8, 127.3, 126.4, 126.2, 121.3, 121.2, 61.1, 35.1, 32.7, 27.2, 25.6. HRMS (ESI) calcd for  $\text{C}_{13}\text{H}_{17}\text{N}_2\text{O}_2$ [ $\text{M}+\text{H}$ ] $^+$  233.1285, found 233.1292.

### 7-fluoro-2-phenylquinazolin-4(3H)-one (3bb)<sup>7</sup>

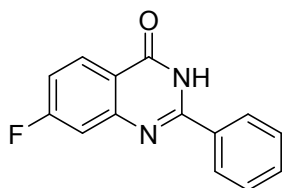

**White solid, Yield: 87%.**

$^1\text{H}$  NMR (400 MHz,  $\text{DMSO-}d_6$ )  $\delta$  12.64 (s, 1H), 8.26 – 8.15 (m, 3H), 7.66 – 7.47 (m, 4H), 7.38 (td,  $J = 8.7, 2.6$  Hz, 1H).  $^{13}\text{C}$  NMR (101 MHz,  $\text{DMSO-}d_6$ )  $\delta$  165.9 (d,  $J = 251.9$  Hz), 161.6, 153.8, 150.9 (d,  $J = 13.5$  Hz), 132.5, 131.7, 129.1 (d,  $J = 40.1$  Hz), 128.7, 128.0, 118.1, 115.3 (d,  $J = 23.7$  Hz), 112.7 (d,  $J = 21.6$  Hz). HRMS (ESI) calcd for  $\text{C}_{14}\text{H}_{10}\text{N}_2\text{OF}$ [ $\text{M}+\text{H}$ ] $^+$  241.0772, found 241.0770.

### 6-fluoro-2-phenylquinazolin-4(3H)-one (3bc)<sup>8</sup>

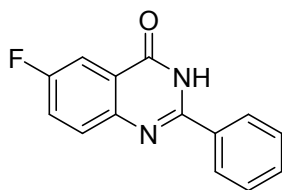

**White solid, Yield: 85%.**

$^1\text{H}$  NMR (400 MHz, DMSO- $d_6$ )  $\delta$  12.61 (s, 1H), 8.17 (d,  $J$  = 7.6 Hz, 2H), 7.82 (dd,  $J$  = 8.7, 5.2 Hz, 2H), 7.75 - 7.71 (m, 1H), 7.60 - 7.56 (m, 3H).  $^{13}\text{C}$  NMR (101 MHz, DMSO- $d_6$ )  $\delta$  161.7, 160.0 (d,  $J$  = 245.9 Hz), 151.9, 145.7, 132.6, 131.5, 130.3, 128.7, 127.8, 123.1 (d,  $J$  = 24.2 Hz), 122.3 (d,  $J$  = 9.8 Hz), 110.6 (d,  $J$  = 23.4 Hz). HRMS (ESI) calcd for  $\text{C}_{14}\text{H}_{10}\text{N}_2\text{OF}[\text{M}+\text{H}]^+$  241.0772, found 241.0780.

**6-chloro-2-phenylquinazolin-4(3H)-one (3bd)<sup>8</sup>**

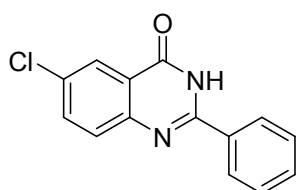

**White solid, Yield: 84%.**

$^1\text{H}$  NMR (400 MHz, DMSO- $d_6$ )  $\delta$  12.72 (s, 1H), 8.18 (d,  $J$  = 7.2 Hz, 2H), 8.09 (d,  $J$  = 2.5 Hz, 1H), 7.86 (dd,  $J$  = 8.7, 2.6 Hz, 1H), 7.76 (d,  $J$  = 8.7 Hz, 1H), 7.63 - 7.54 (m, 3H).  $^{13}\text{C}$  NMR (101 MHz, DMSO- $d_6$ )  $\delta$  161.2, 152.7, 147.4, 134.6, 132.3, 131.5, 130.7, 129.6, 128.5, 127.7, 124.8, 122.1. HRMS (ESI) calcd for  $\text{C}_{14}\text{H}_{10}\text{N}_2\text{OCl}[\text{M}+\text{H}]^+$  257.0476, found 257.0476.

**5-chloro-2-phenylquinazolin-4(3H)-one (3be)<sup>7</sup>**

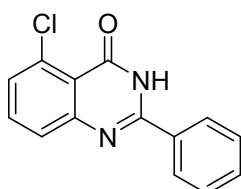

**White solid, Yield: 85%.**

$^1\text{H}$  NMR (400 MHz, DMSO- $d_6$ )  $\delta$  12.55 (s, 1H), 8.18 (d,  $J$  = 7.5 Hz, 2H), 7.75 (t,  $J$  = 7.8 Hz, 1H), 7.68 (d,  $J$  = 8.1 Hz, 1H), 7.77 - 7.51 (m, 4H).  $^{13}\text{C}$  NMR (101 MHz, DMSO- $d_6$ )  $\delta$  160.4, 153.0, 151.3, 134.4, 132.6, 132.2, 131.7, 128.9, 128.7, 127.9, 127.2, 118.0. HRMS (ESI) calcd for  $\text{C}_{14}\text{H}_{10}\text{N}_2\text{OCl}[\text{M}+\text{H}]^+$  257.0476, found 257.0477.

**8-methyl-2-phenylquinazolin-4(3H)-one (3bf)<sup>2</sup>**

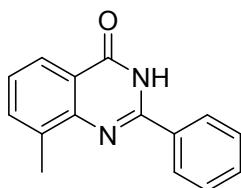

**White solid, Yield: 86%.**

$^1\text{H}$  NMR (400 MHz,  $\text{DMSO-}d_6$ )  $\delta$  12.53 (s, 1H), 8.24 (d,  $J = 6.8$  Hz, 2H), 8.01 (d,  $J = 7.9$  Hz, 1H), 7.70 (d,  $J = 7.3$  Hz, 1H), 7.60 - 7.55 (m, 3H), 7.40 (t,  $J = 7.6$  Hz, 1H), 2.63 (s, 3H).  $^{13}\text{C}$  NMR (101 MHz,  $\text{DMSO-}d_6$ )  $\delta$  162.6 , 151.1 , 147.2 , 135.7 , 135.1 , 133.0 , 131.4 , 128.7 , 127.8 , 126.1 , 123.6 , 121.0 , 17.3 . HRMS (ESI) calcd for  $\text{C}_{15}\text{H}_{13}\text{N}_2\text{O}$   $[\text{M}+\text{H}]^+$  237.1022, found 237.1023.

### 2-phenyl-7-(trifluoromethyl)quinazolin-4(3H)-one (3bg)<sup>9</sup>

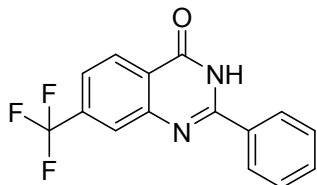

**White solid, Yield: 87%.**

$^1\text{H}$  NMR (500 MHz,  $\text{DMSO-}d_6$ )  $\delta$  12.83 (s, 1H), 8.35 (d,  $J = 8.3$  Hz, 1H), 8.21 (d,  $J = 7.4$  Hz, 2H), 8.05 (s, 1H), 7.81 (d,  $J = 8.3$  Hz, 1H), 7.60 (dt,  $J = 26.2, 7.4$  Hz, 3H).  $^{13}\text{C}$  NMR (101 MHz,  $\text{DMSO-}d_6$ )  $\delta$  161.6 , 154.0 , 148.9 , 134.3 (q,  $J = 31.9$  Hz) , 132.4 , 131.9 , 128.7 , 128.1 , 127.8 , 125.0, 124.7 (q,  $J = 3.4$  Hz) , 123.9 , 123.5 (q,  $J = 240.4$  Hz) , 122.3 (q,  $J = 3.1$  Hz). HRMS (ESI) calcd for  $\text{C}_{15}\text{H}_{10}\text{N}_2\text{OF}_3$   $[\text{M}+\text{H}]^+$  291.0740, found 291.0732.

### 6-chloro-2-pentylquinazolin-4(3H)-one (3bh)<sup>6</sup>

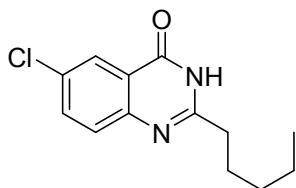

**White solid, Yield: 46%.**

$^1\text{H}$  NMR (400 MHz,  $\text{DMSO-}d_6$ )  $\delta$  12.35 (s, 1H), 8.01 (d,  $J = 2.5$  Hz, 1H), 7.79 (dd,  $J = 8.7, 2.5$  Hz, 1H), 7.62 (d,  $J = 8.7$  Hz, 1H), 2.59 (t,  $J = 7.8$  Hz, 2H), 1.72 (p,  $J = 7.3$  Hz, 2H), 1.39 – 1.24 (m, 4H), 0.87 (t,  $J = 6.8$  Hz, 3H).  $^{13}\text{C}$  NMR (101 MHz,  $\text{DMSO-}d_6$ )  $\delta$  160.9 , 158.2 , 147.7 , 134.4 , 130.2 , 129.1 , 124.7 , 122.1 , 34.5 , 30.8 , 26.5 , 21.9 , 13.9 . HRMS (ESI) calcd for  $\text{C}_{13}\text{H}_{16}\text{N}_2\text{OCl}$   $[\text{M}+\text{H}]^+$  251.0946, found 251.0944.

### 5-chloro-2-pentylquinazolin-4(3H)-one (3bi)

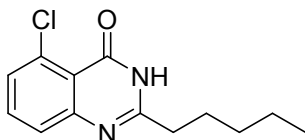

**White solid, Yield: 53%, mp 177-178 °C.**

$^1\text{H}$  NMR (400 MHz,  $\text{DMSO-}d_6$ )  $\delta$  12.21 (s, 1H), 7.67 (t,  $J = 8.0$  Hz, 1H), 7.53 (dd,  $J = 8.3, 1.2$  Hz, 1H), 7.45 (dd,  $J = 7.8, 1.2$  Hz, 1H), 2.56 (t,  $J = 8.0$  Hz, 2H), 1.79 – 1.62 (m, 2H), 1.39 – 1.23 (m, 4H), 0.96 – 0.79 (m, 3H).  $^{13}\text{C}$  NMR (101 MHz,  $\text{DMSO-}d_6$ )  $\delta$  160.0 , 158.5 , 151.6 , 134.1 , 132.4 , 128.3 , 126.5 , 117.8 , 34.2 , 30.8 , 26.4 , 21.9 , 13.9 . HRMS (ESI) calcd for  $\text{C}_{13}\text{H}_{16}\text{N}_2\text{OCl}$   $[\text{M}+\text{H}]^+$  251.0946, found 251.0945.

### 8-methoxy-2-pentylquinazolin-4(3H)-one (3bj)

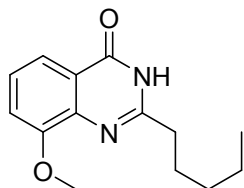

**White solid, Yield: 42%, mp 206-207 °C.**

$^1\text{H}$  NMR (400 MHz, DMSO- $d_6$ )  $\delta$  12.19 (s, 1H), 7.63 (d,  $J = 7.8$  Hz, 1H), 7.37 (t,  $J = 7.9$  Hz, 1H), 7.31 (d,  $J = 7.9$  Hz, 1H), 3.89 (s, 3H), 2.58 (t,  $J = 7.6$  Hz, 2H), 1.71 (p,  $J = 7.4$  Hz, 2H), 1.31 (t,  $J = 7.1$  Hz, 4H), 0.88 (t,  $J = 6.7$  Hz, 3H).  $^{13}\text{C}$  NMR (101 MHz, DMSO- $d_6$ )  $\delta$  161.8, 156.3, 154.3, 139.6, 126.1, 121.9, 116.8, 114.9, 55.9, 34.9, 30.9, 27.0, 21.9, 13.9. HRMS (ESI) calcd for  $\text{C}_{14}\text{H}_{19}\text{N}_2\text{O}_2$   $[\text{M}+\text{H}]^+$  247.1441, found 247.1441.

### 8-methyl-2-pentylquinazolin-4(3H)-one (3bk)

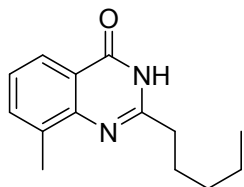

**White solid, Yield: 54%, mp 139-140 °C.**

$^1\text{H}$  NMR (400 MHz, DMSO- $d_6$ )  $\delta$  12.14 (s, 1H), 7.92 (d,  $J = 7.9$  Hz, 1H), 7.62 (d,  $J = 7.2$  Hz, 1H), 7.33 (t,  $J = 7.6$  Hz, 1H), 2.61 (t,  $J = 7.6$  Hz, 2H), 2.51 (s, 3H), 1.75 (p,  $J = 7.2$  Hz, 2H), 1.36 - 1.30 (m, 4H), 0.88 (t,  $J = 6.5$  Hz, 3H).  $^{13}\text{C}$  NMR (101 MHz, DMSO- $d_6$ )  $\delta$  162.2, 156.3, 147.4, 134.9, 134.6, 125.4, 123.4, 120.7, 34.6, 30.8, 26.4, 21.9, 17.2, 13.9. HRMS (ESI) calcd for  $\text{C}_{14}\text{H}_{19}\text{N}_2\text{O}$   $[\text{M}+\text{H}]^+$  231.1492, found 231.1492.

#### 4. References

- (1) J. Chen, D. Wu, F. He, M. Liu, H. Wu, J. Ding and W. Su, *Tetrahedron Lett.*, 2008, **23**, 3814.
- (2) S. Parua, S. Das, R. Sikari, S. Sinha, and N. D. Paul, *J. Org. Chem.*, 2017, **82**, 7165.
- (3) S. Guo, Y. Li, L. Tao, W. Zhang, and X. Fan, *RSC Adv.*, 2014, **4**, 59289.
- (3) W. Xu, Y. Jin, H. Liu, Y. Jiang and H. Fu, *Org. Lett.*, 2011, **13**, 1274.
- (4) K. Upadhyaya, R. K. Thakur, S. K. Shukla, and R. Tripathi, *J. Org. Chem.*, 2016, **81**, 5046.
- (5) Q. Li, Y. Huang, T. Chen, Y. Zhou, Q. Xu, S. F. Yin, and Li. B. Han, *Org. Lett.*, 2014, **16**, 3672.
- (6) T. Pandula, A. Kirinde, C. S. Yi, *Org. Lett.* 2019, **21**, 3337.
- (7) Z. Z. Wang, Y. Tang, *Tetrahedron*, 2016, **72**, 1330.
- (8) W. He, H. Zhao, R. Yao, and M. Cai, *RSC Adv.*, 2014, **4**, 50285.
- (9) H. Chai, J. Li, L. Yang, H. Lu, Z. Qi, D. Shi, *RSC Adv*, 2014, **84**, 44811.

## 5. <sup>1</sup>H NMR and <sup>13</sup>C NMR Spectra of the Target Compounds

20200331 wk3650/1

Bruker AVANCEIII 400 20200331

PROTON2 DMSO D:\ DATA-2020 15

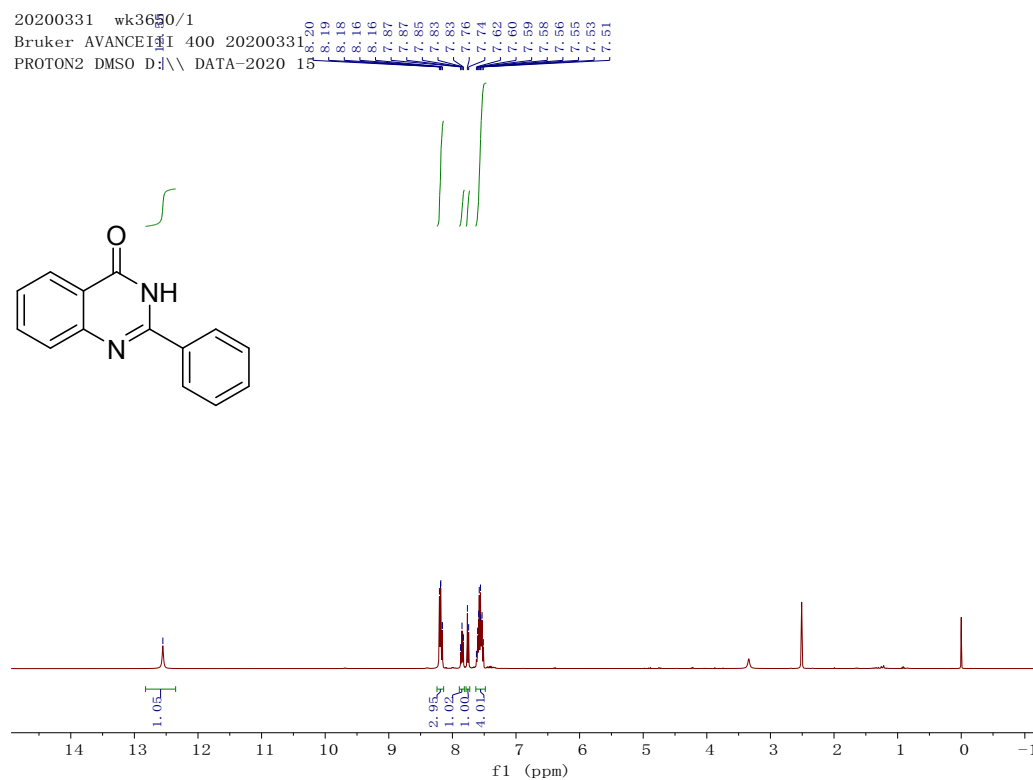

<sup>1</sup>H NMR spectrum of 3a

20200401 wk3650/1

Bruker AVANCEIII 400 20200331

C13 DMSO D:\ DATA-2020 8

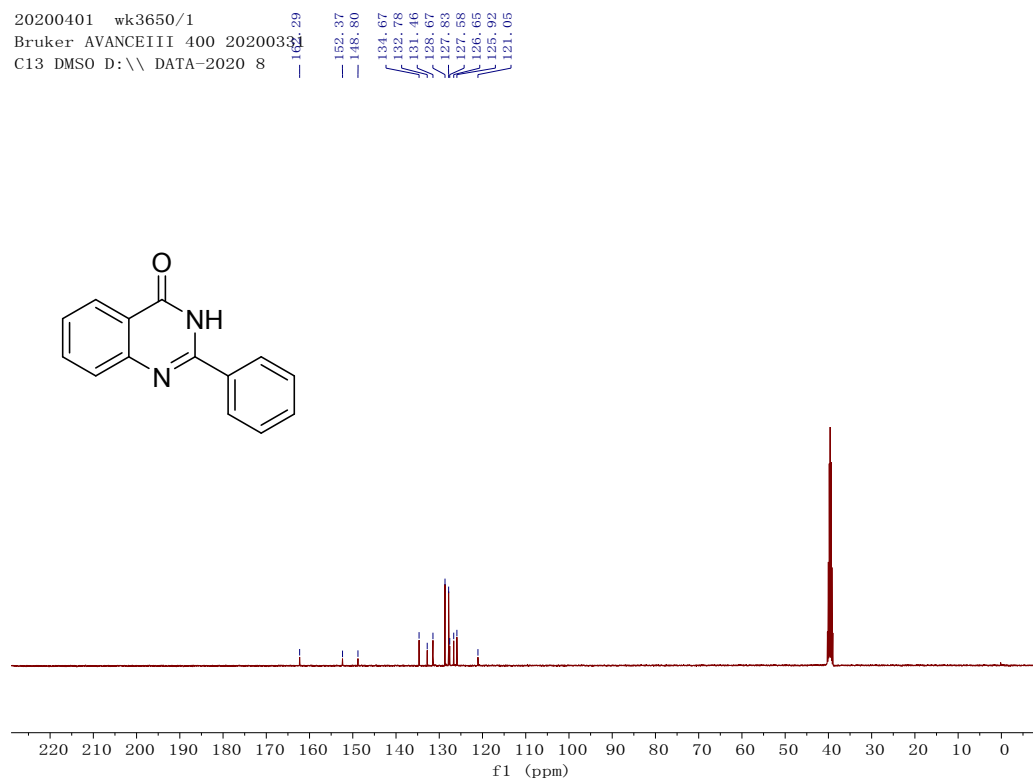

<sup>13</sup>C NMR spectrum of 3a

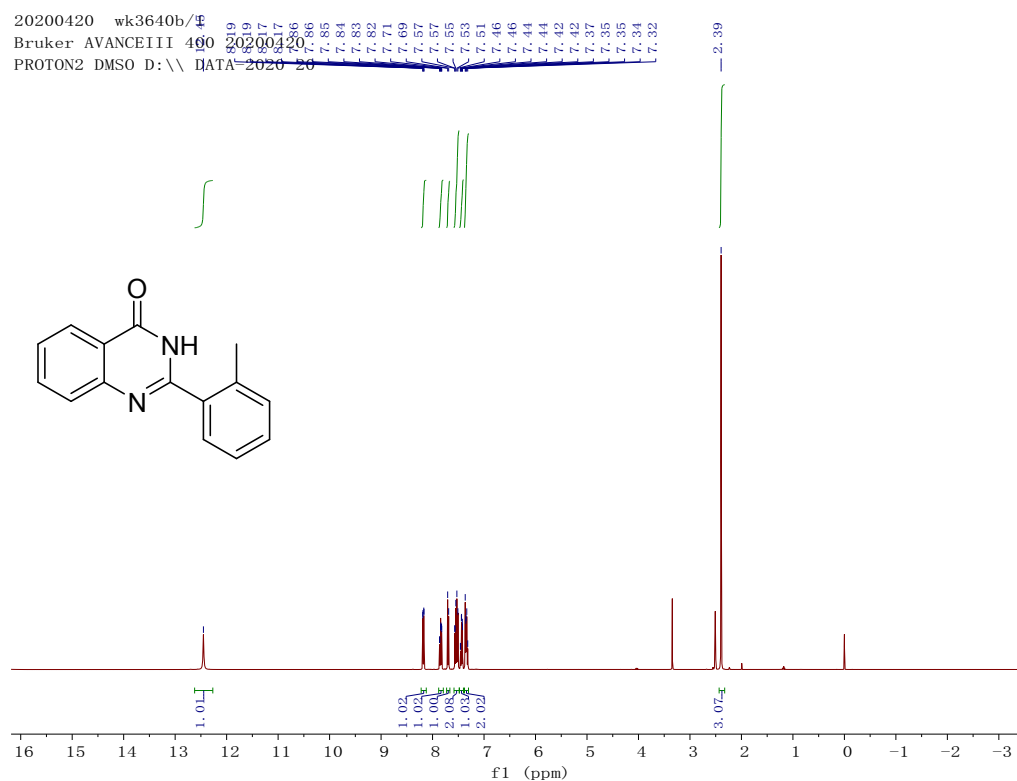

**<sup>1</sup>H NMR spectrum of 3b**

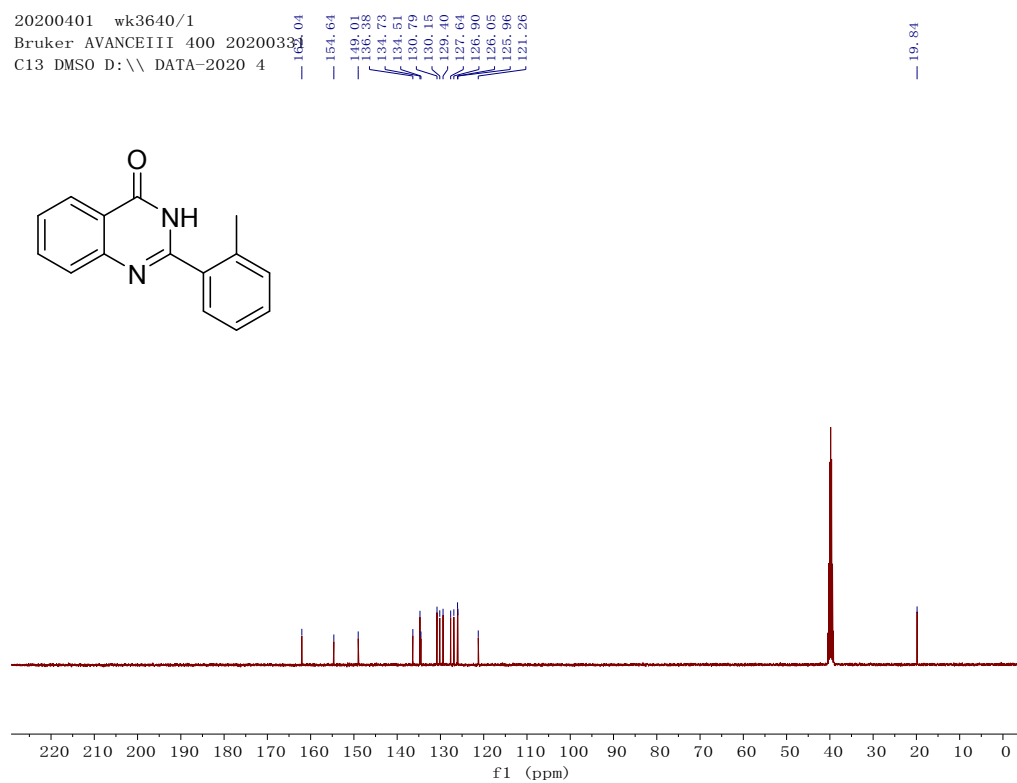

**<sup>13</sup>C NMR spectrum of 3b**

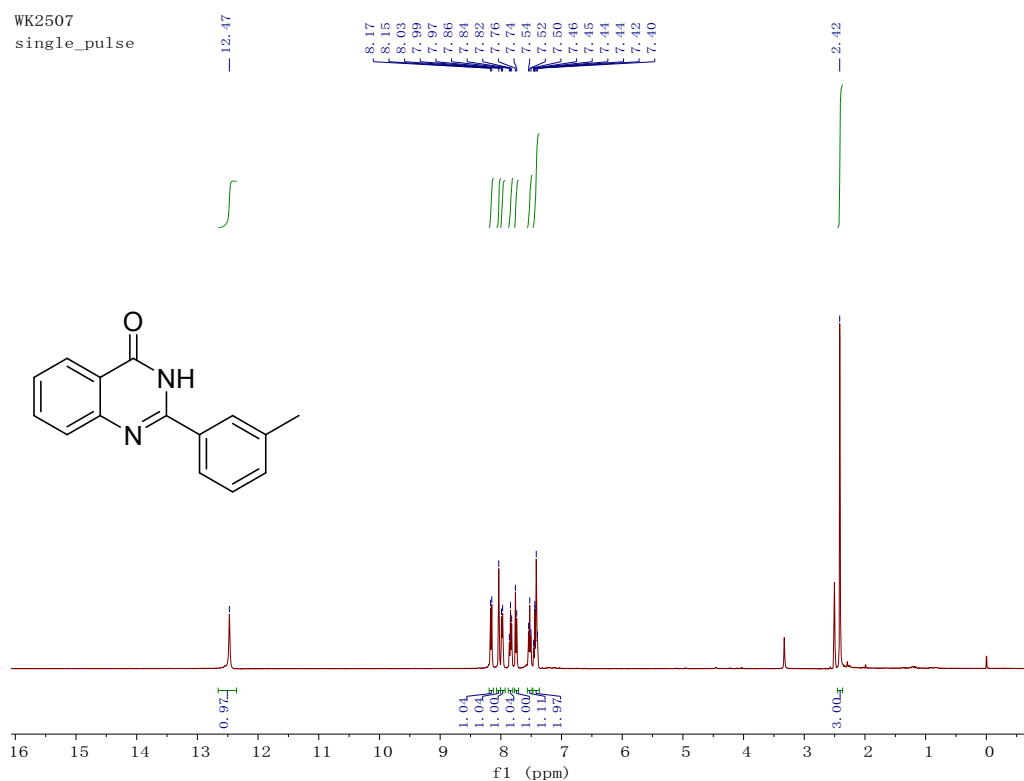

**<sup>1</sup>H NMR spectrum of 3c**

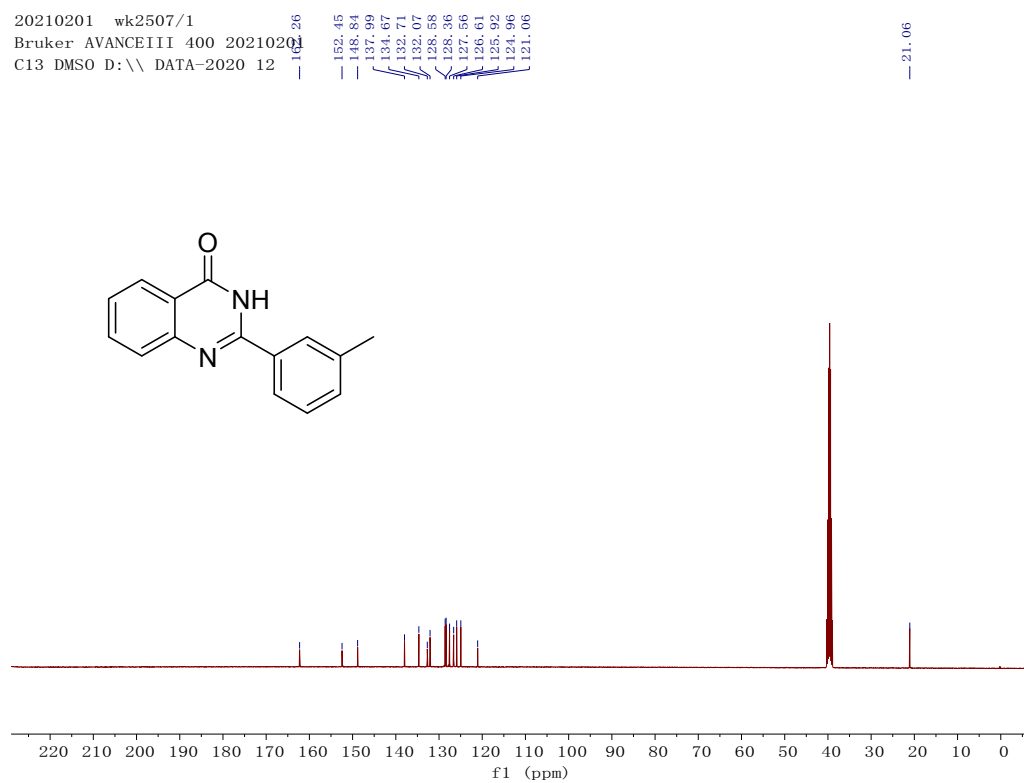

**<sup>13</sup>C NMR spectrum of 3c**



20200331 wk3635-34/1  
 Bruker AVANCEIII 400 20200331  
 PROTON2 DMSO D:\ DATA-2020 8

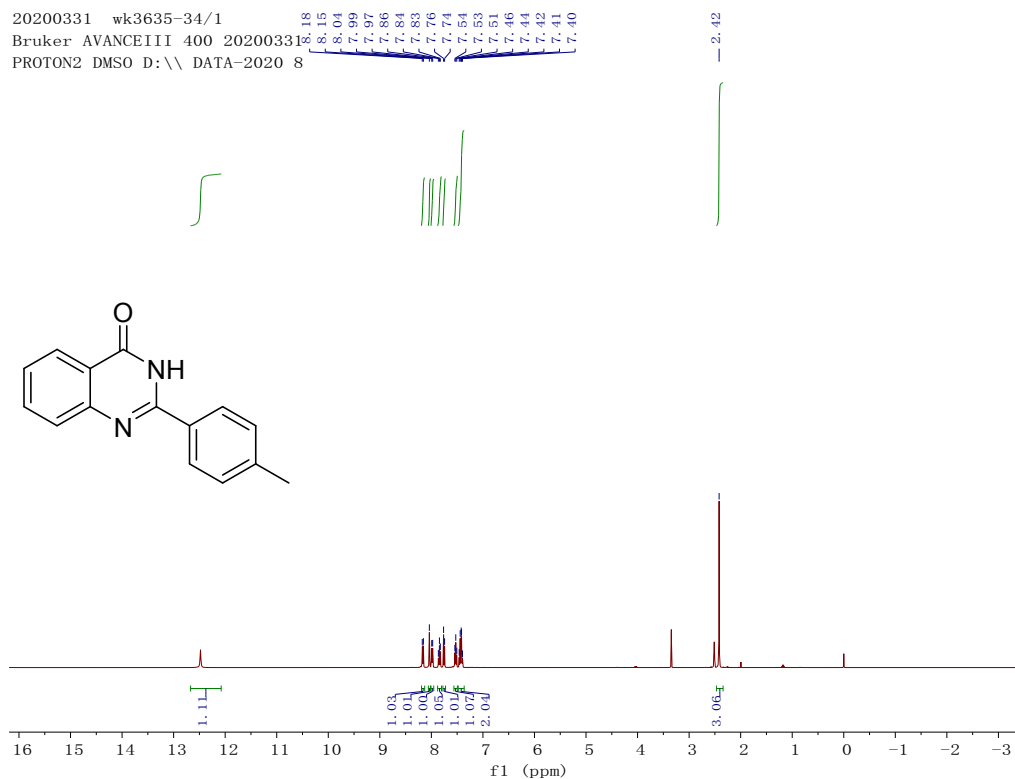

**<sup>1</sup>H NMR spectrum of 3d**

20200401 wk3635-34/1  
 Bruker AVANCEIII 400 20200331  
 C13 DMSO D:\ DATA-2020 1

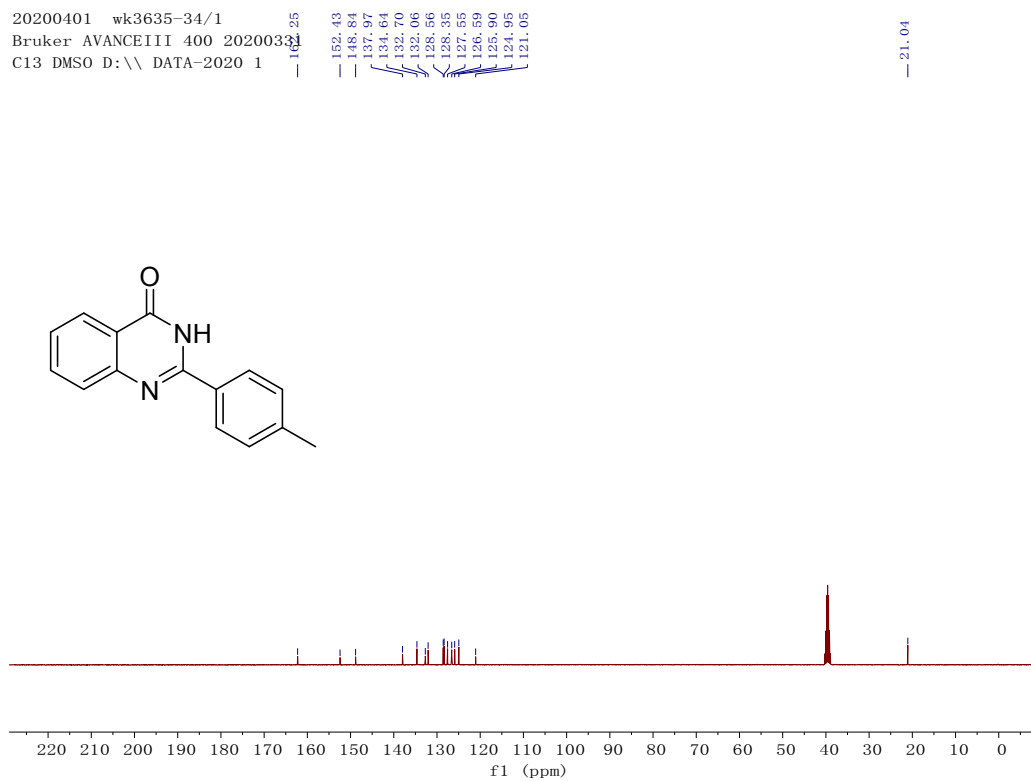

**<sup>13</sup>C NMR spectrum of 3d**

20210223-wk2512/2  
PROTON DMSO D: \\\\ fengzhi@fang.com

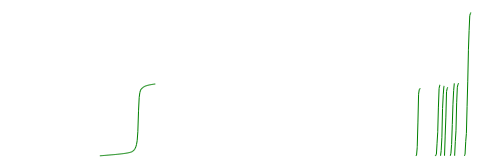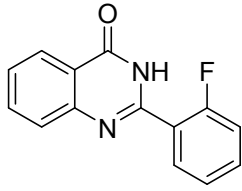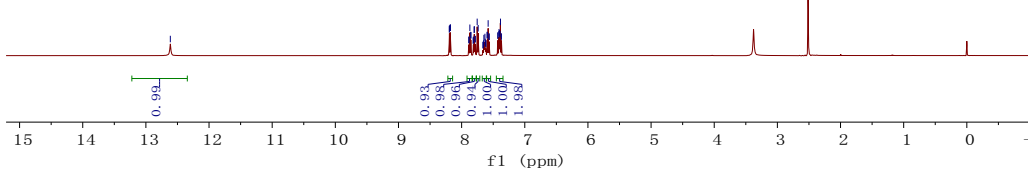

**<sup>1</sup>H NMR spectrum of 3e**

20210223-wk2512/2  
C13CPD DMSO D: \\\\ fengzhi@fang.com

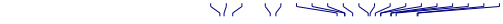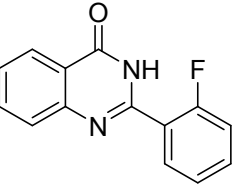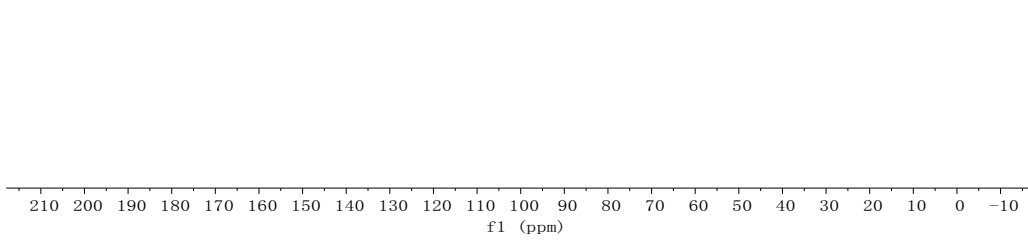

**<sup>13</sup>C NMR spectrum of 3e**

Wk2513  
single\_pulse

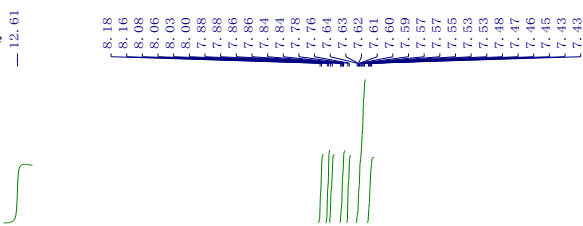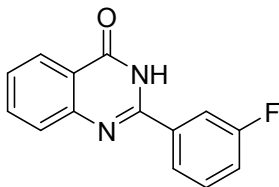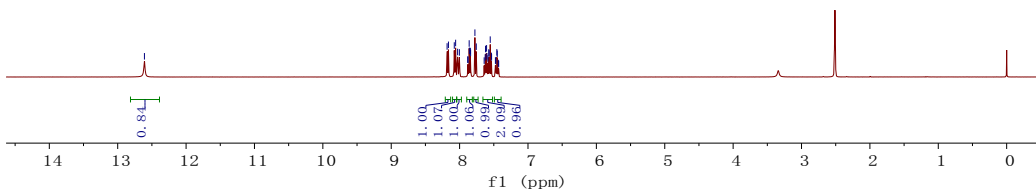

**<sup>1</sup>H NMR spectrum of 3f**

20210223-wk2513/1  
C13CPD DMSO D:\

fengzhiqiang 5  
163.7594  
162.7458  
161.7214

151.1259  
148.5636

135.1385  
135.0740  
134.8251  
130.9047  
130.8392  
127.7349  
127.0467  
125.9972  
124.0583  
121.2310  
118.4760  
118.3082  
114.7494  
114.5590

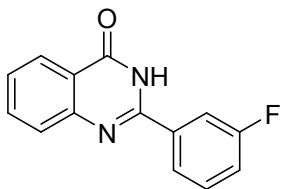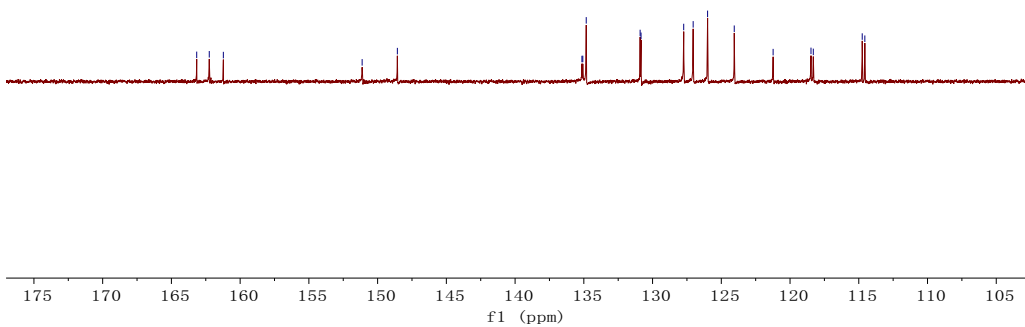

**<sup>13</sup>C NMR spectrum of 3f**

20200331 wk3636/1  
 Bruker AVANCEIII 400 20200331  
 PROTON2 DMSO D:\ DATA-2020 9

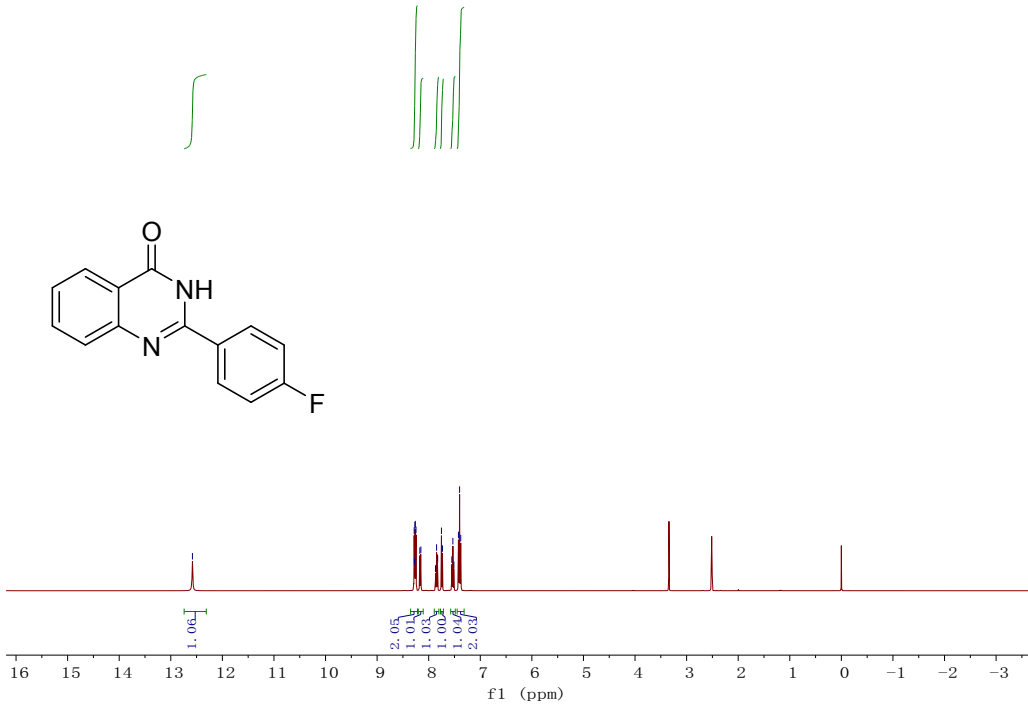

**<sup>1</sup>H NMR spectrum of 3g**

20200401 wk3636/1  
 Bruker AVANCEIII 400 20200331  
 C13 DMSO D:\ DATA-2020 2

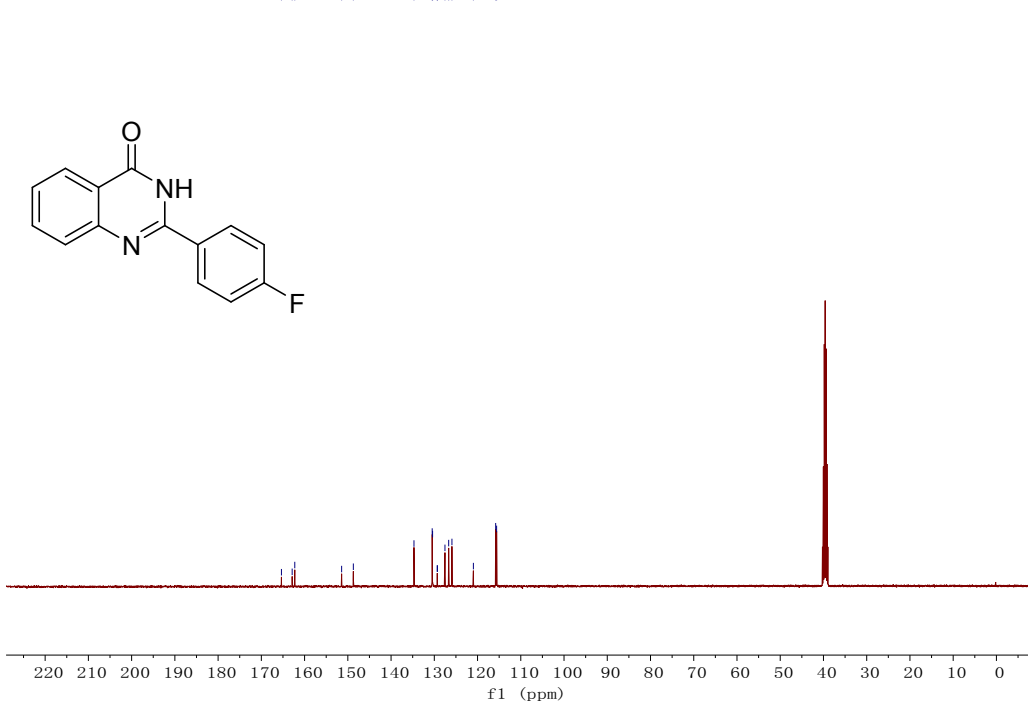

**<sup>13</sup>C NMR spectrum of 3g**

20200331 wk3644/15  
 Bruker AVANCEIII 400 20200331  
 PROTON2 DMSO D:\ DATA-2020 12

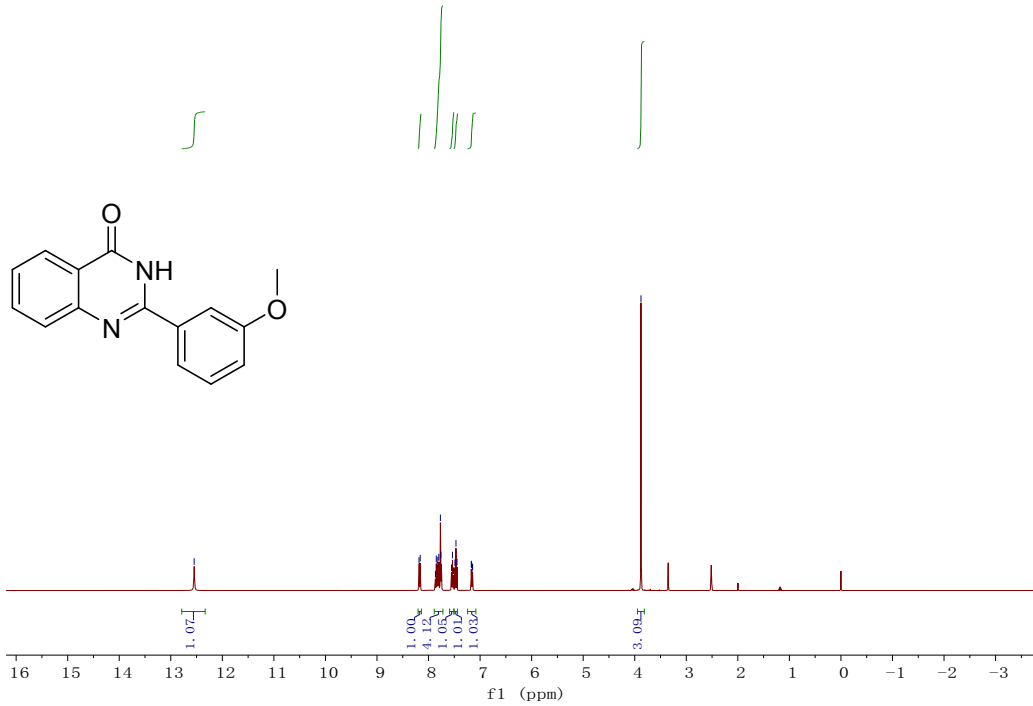

**<sup>1</sup>H NMR spectrum of 3h**

20200401 wk3644/1  
 Bruker AVANCEIII 400 20200331  
 C13 DMSO D:\ DATA-2020 6

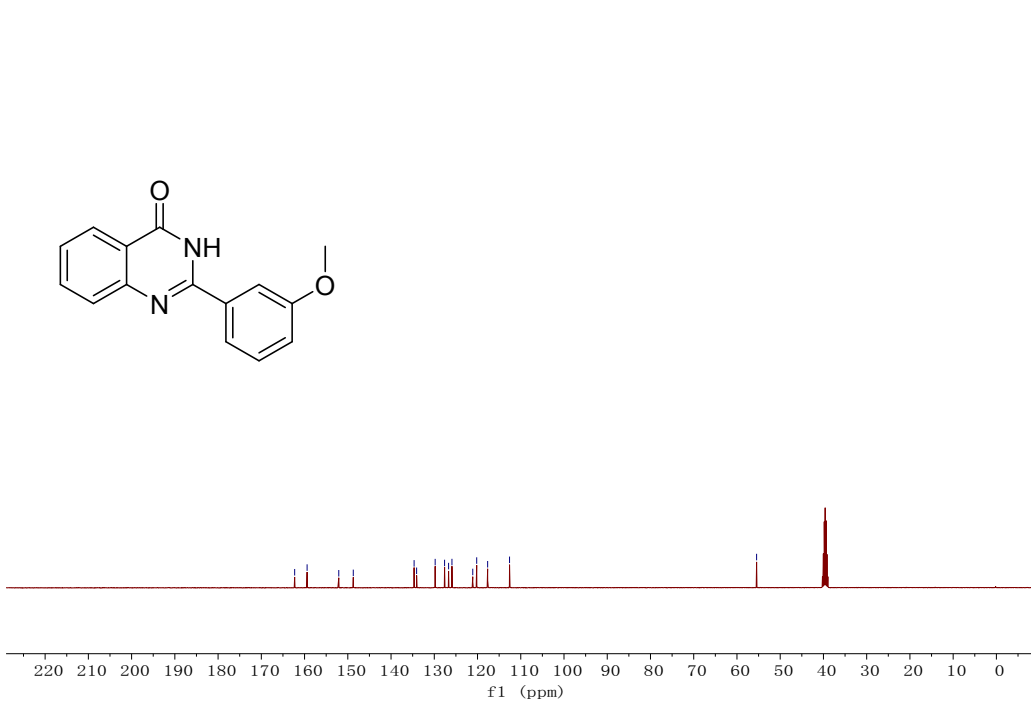

**<sup>13</sup>C NMR spectrum of 3h**

20200331 wk3643/1  
Bruker AVANCEIII 400 20200331  
PROTON2 DMSO D:\ DATA-2020 11

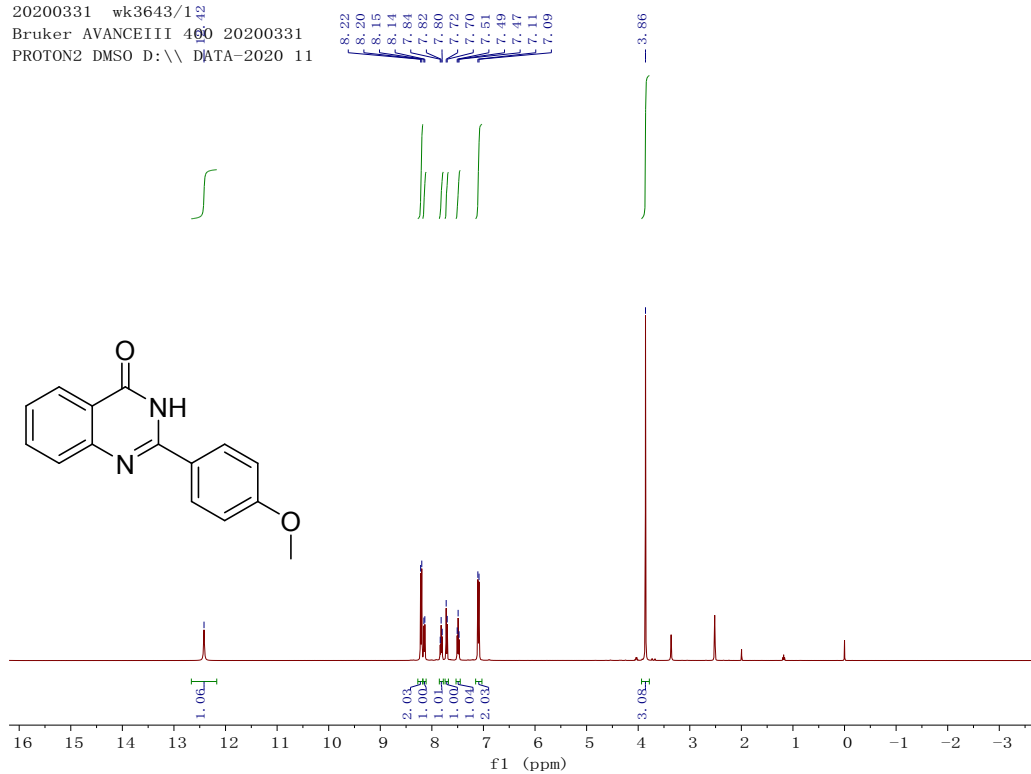

**<sup>1</sup>H NMR spectrum of 3i**

20200401 wk3643/1  
Bruker AVANCEIII 400 20200331  
C13 DMSO D:\ DATA-2020 5

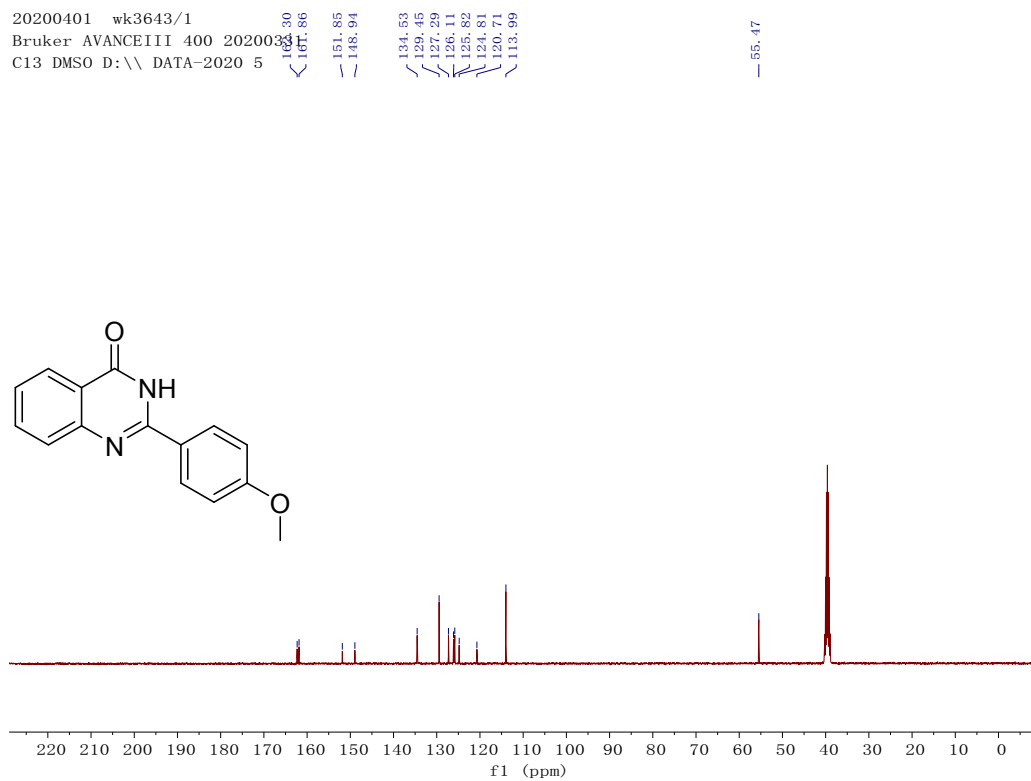

**<sup>13</sup>C NMR spectrum of 3i**

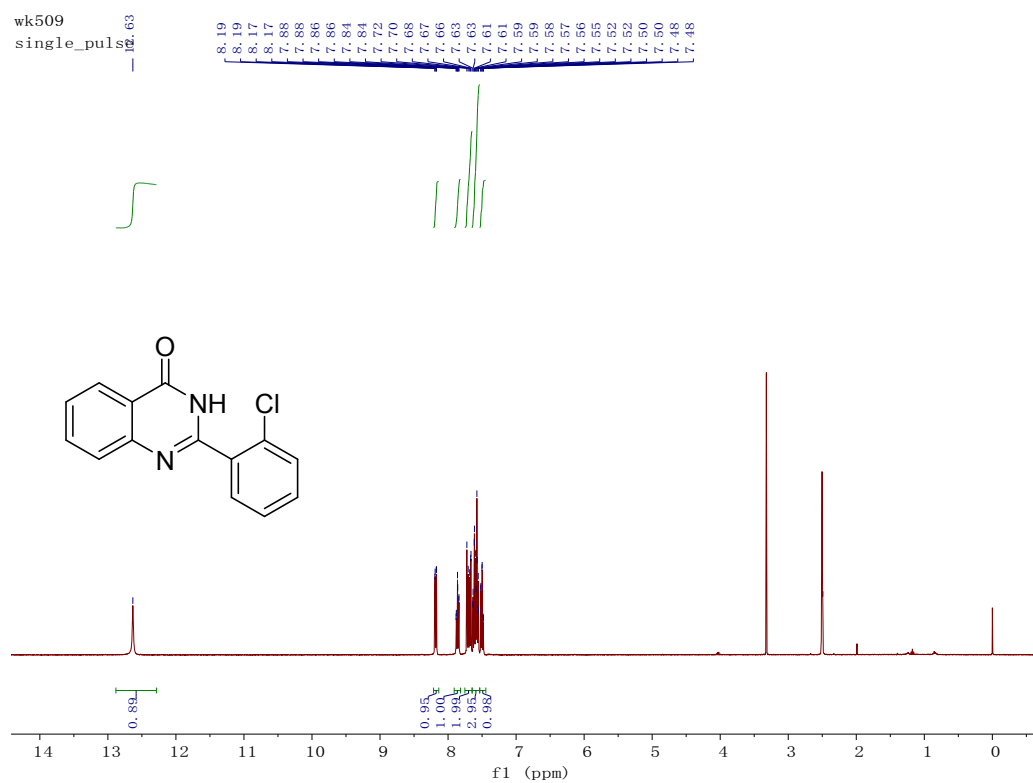

**<sup>1</sup>H NMR spectrum of 3j**

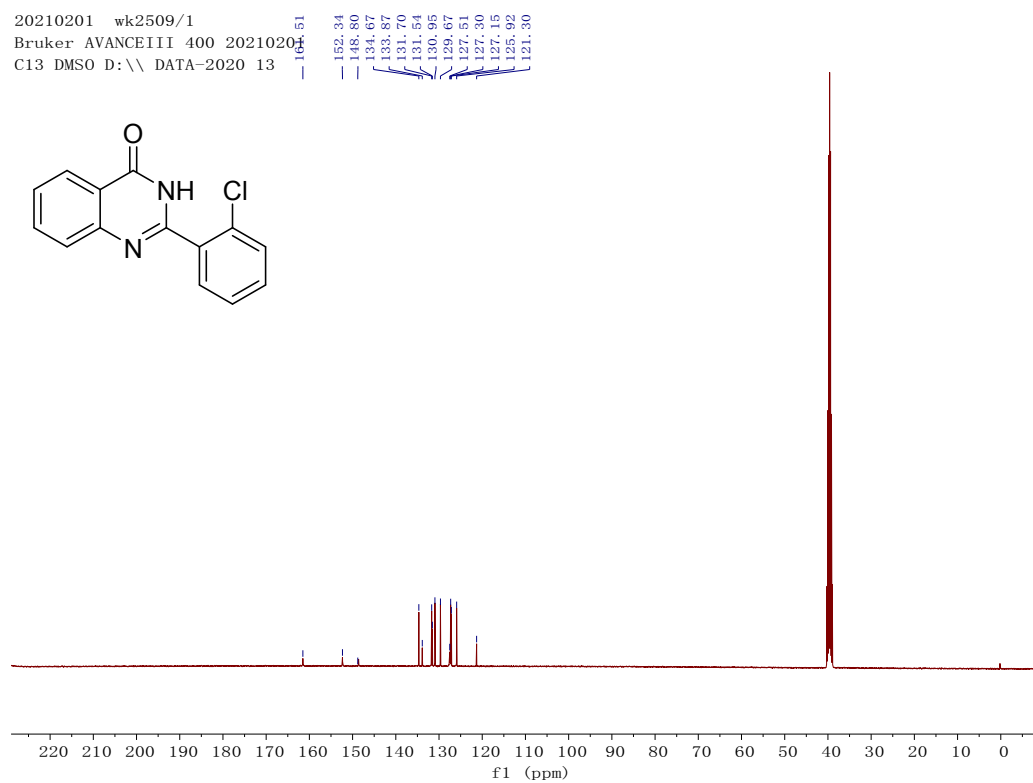

**<sup>13</sup>C NMR spectrum of 3j**

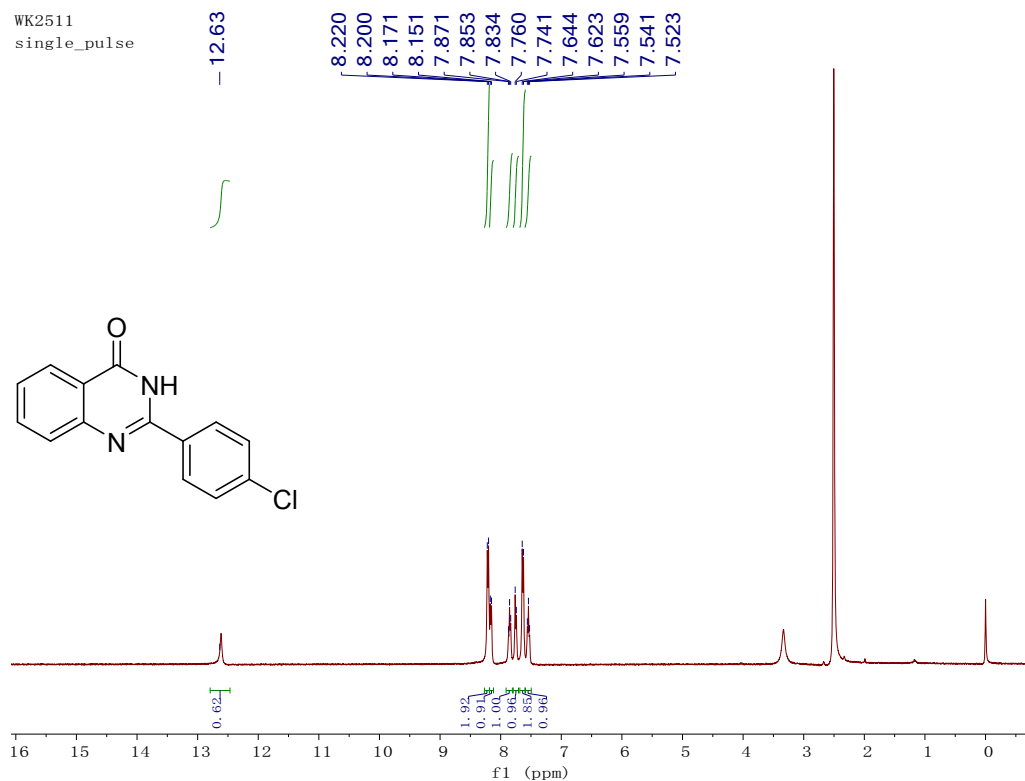

**<sup>1</sup>H NMR spectrum of 3k**

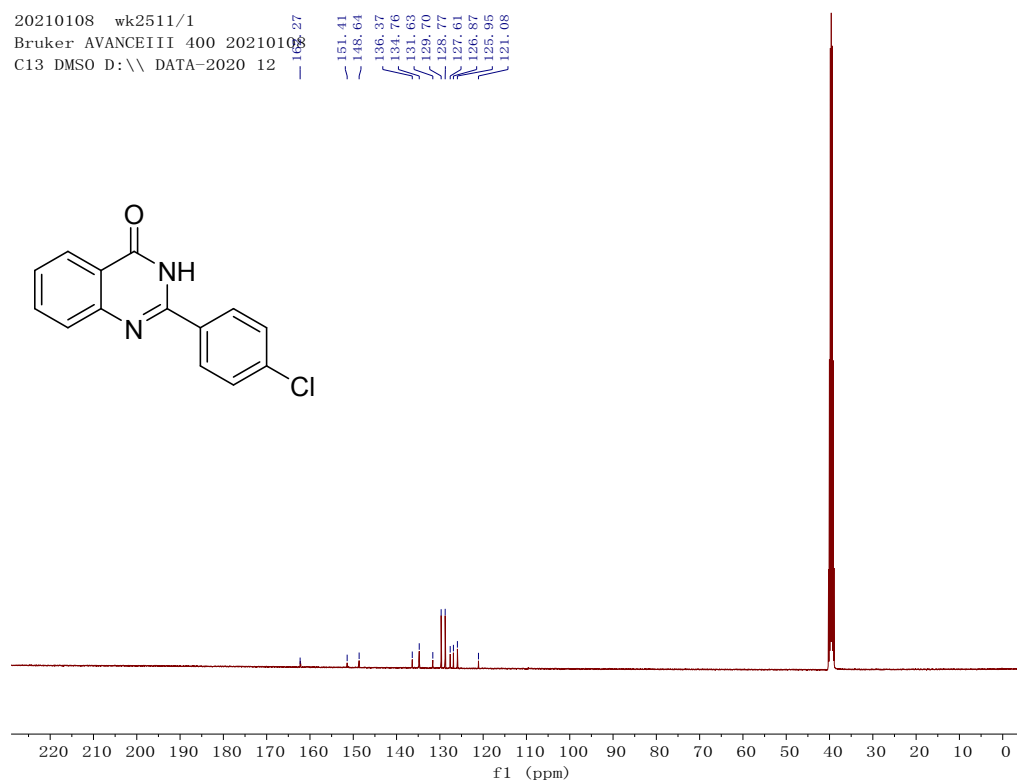

**<sup>13</sup>C NMR spectrum of 3k**



wk2527/1

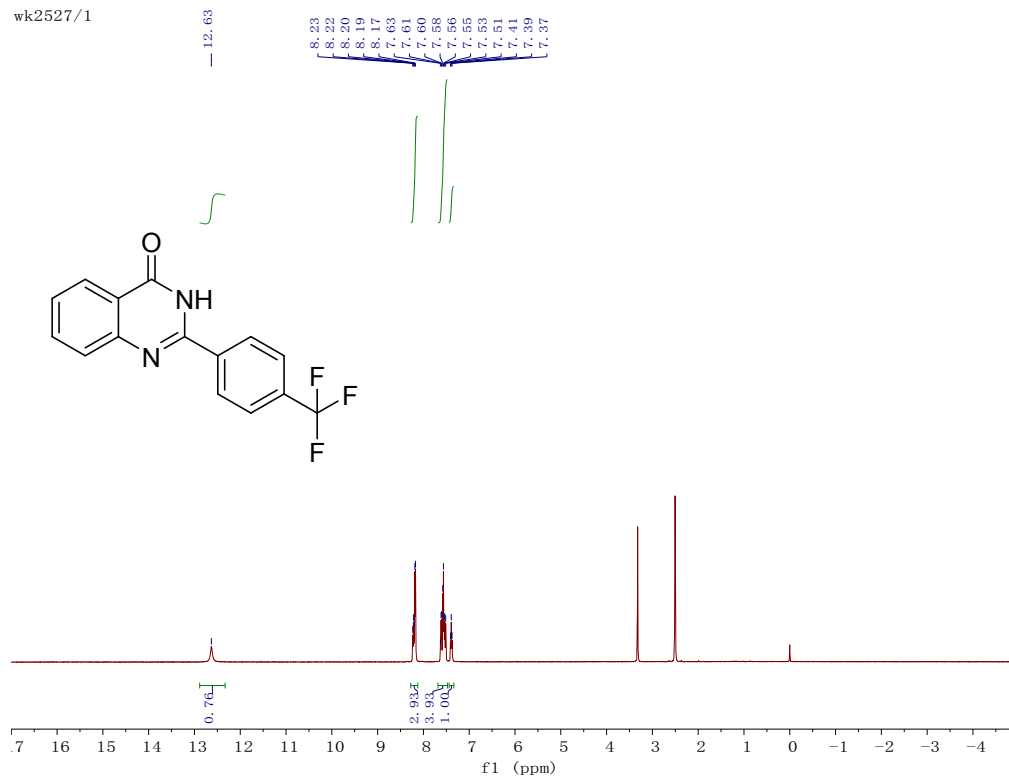

**<sup>1</sup>H NMR spectrum of 3I**

20200401 wk3645/1

Bruker AVANCEIII 400 2020033

C13 DMSO D:\ DATA-2020 7

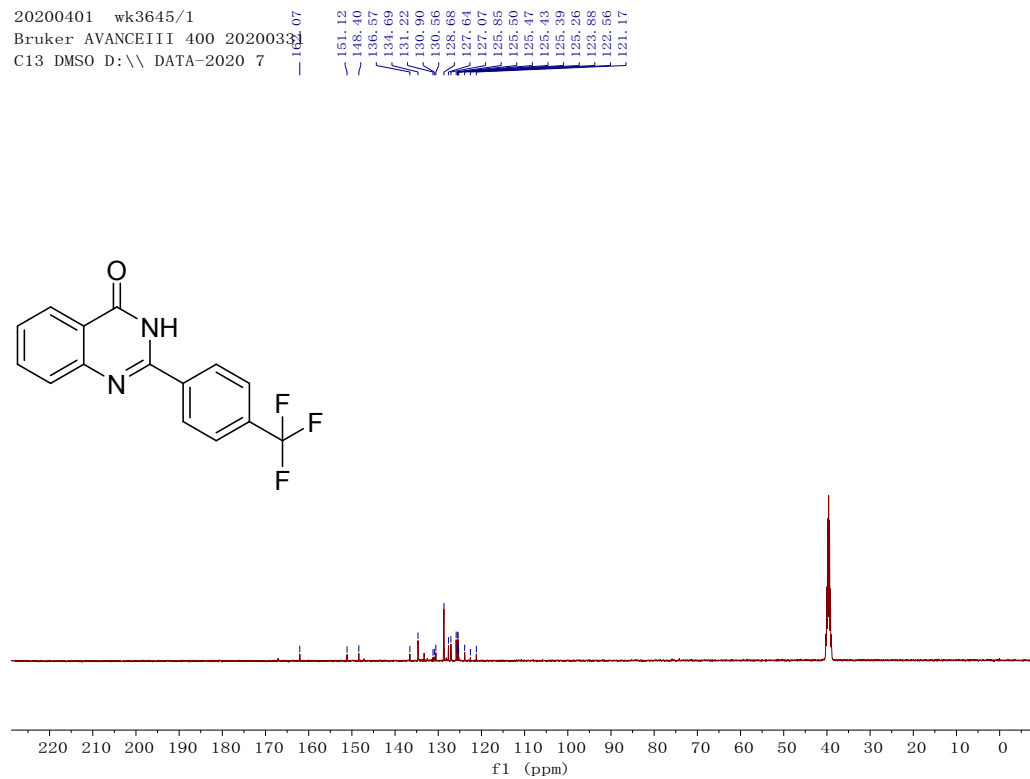

**<sup>13</sup>C NMR spectrum of 3I**

wk2521/1

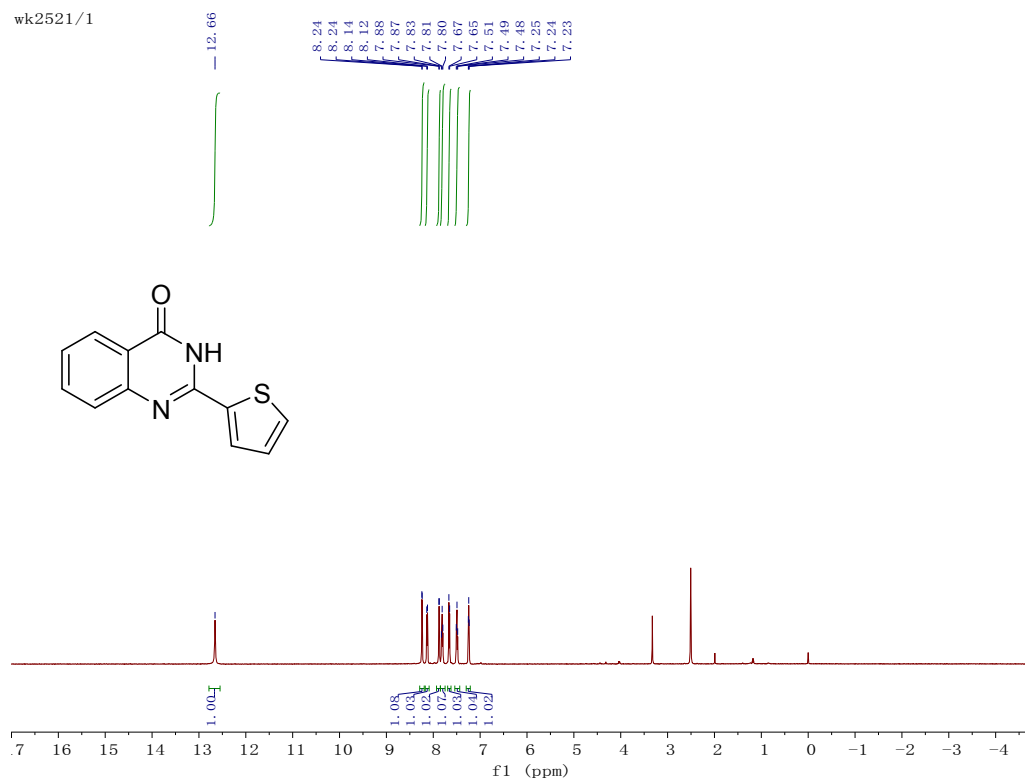

**<sup>1</sup>H NMR spectrum of 3m**

20210105 wk2521/1

Bruker AVANCEIII 400 20210105  
C13 DMSO D:\ DATA-2020 8

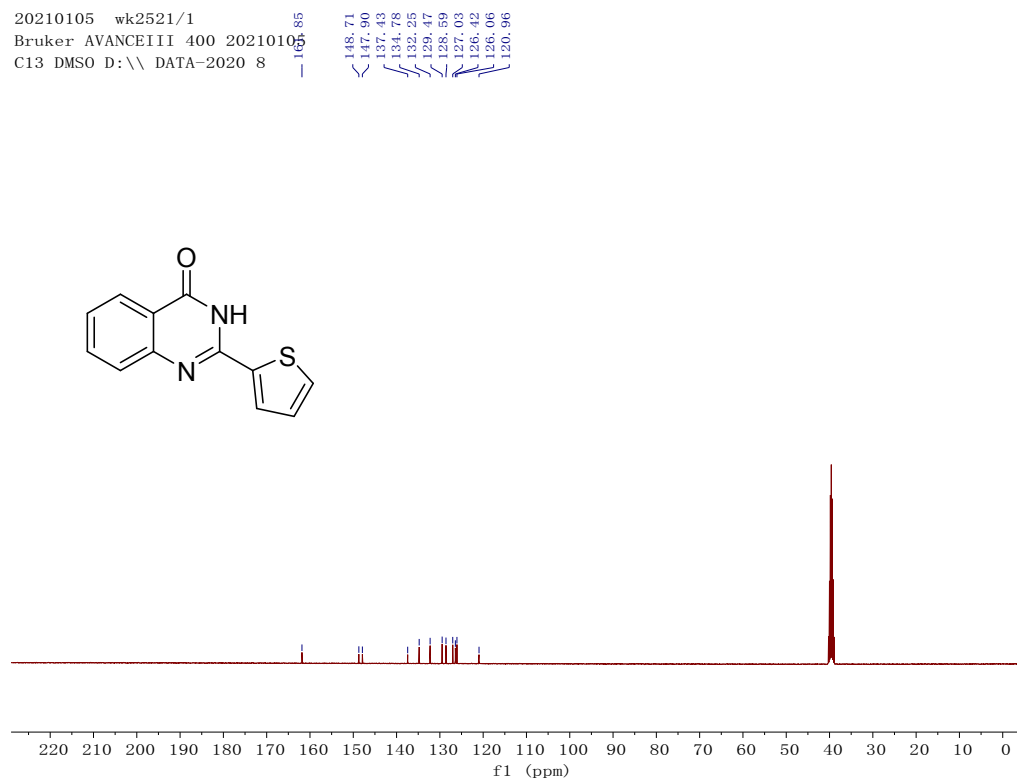

**<sup>13</sup>C NMR spectrum of 3m**

20200403 wk3709/1  
Bruker AVANCEIII 400 20200402  
PROTON2 DMSO D:\ DATA-2020 10

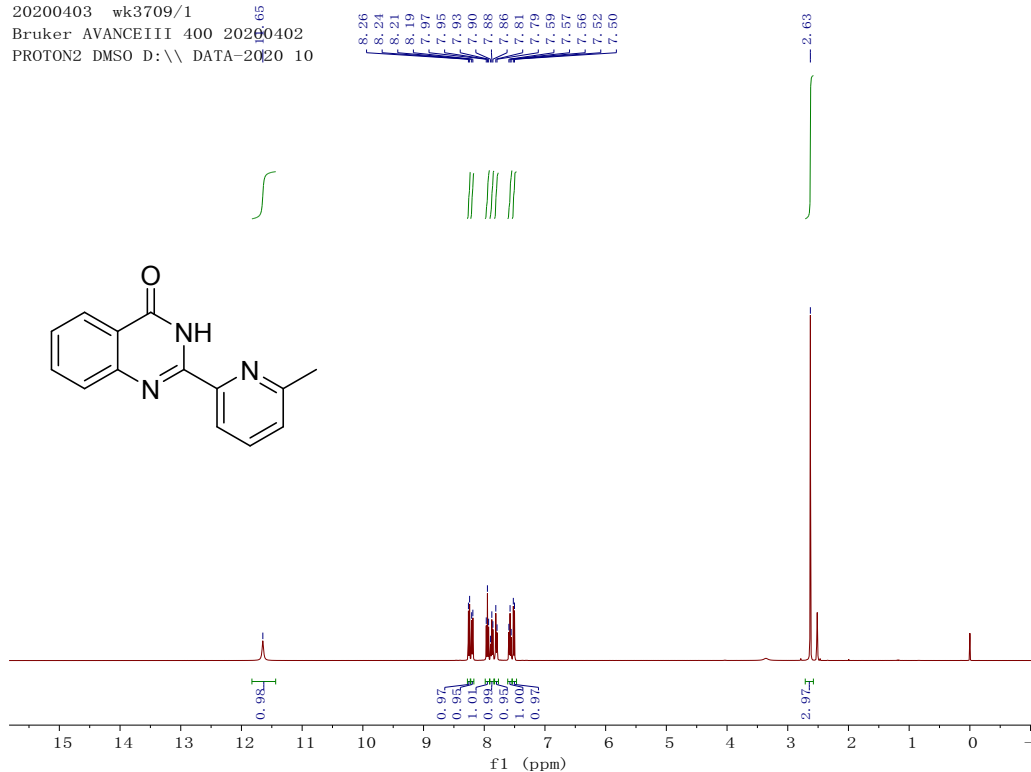

**<sup>1</sup>H NMR spectrum of 3n**

20200403 wk3709/2  
Bruker AVANCEIII 400 20200402  
C13 DMSO D:\ DATA-2020 10

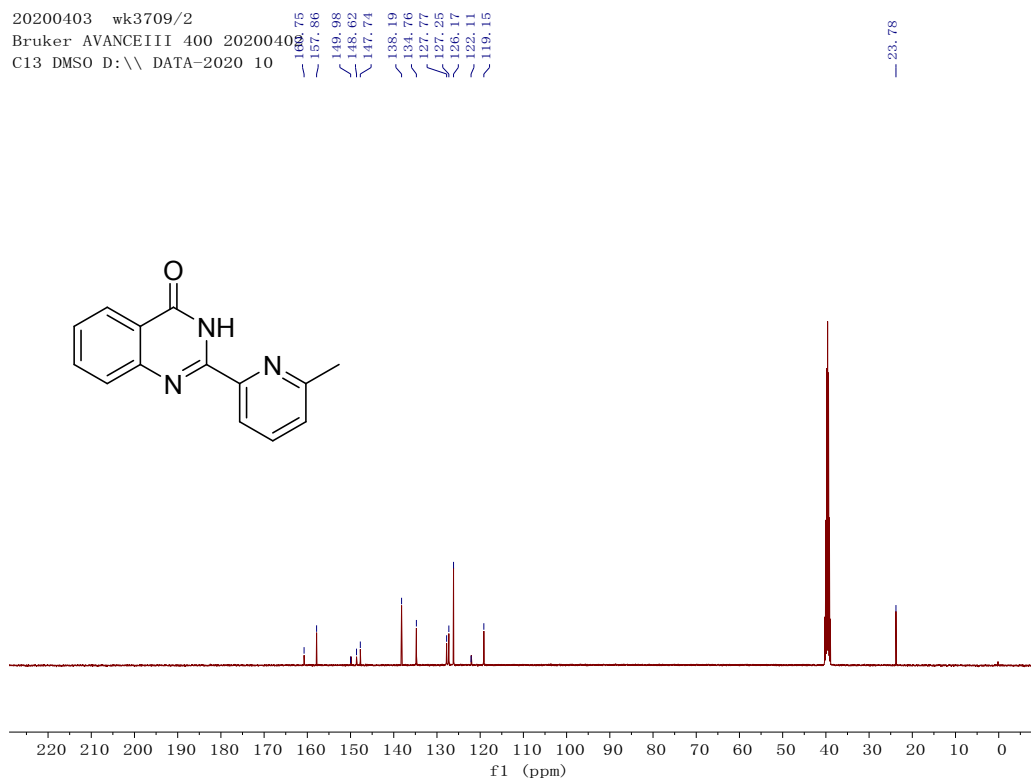

**<sup>13</sup>C NMR spectrum of 3n**

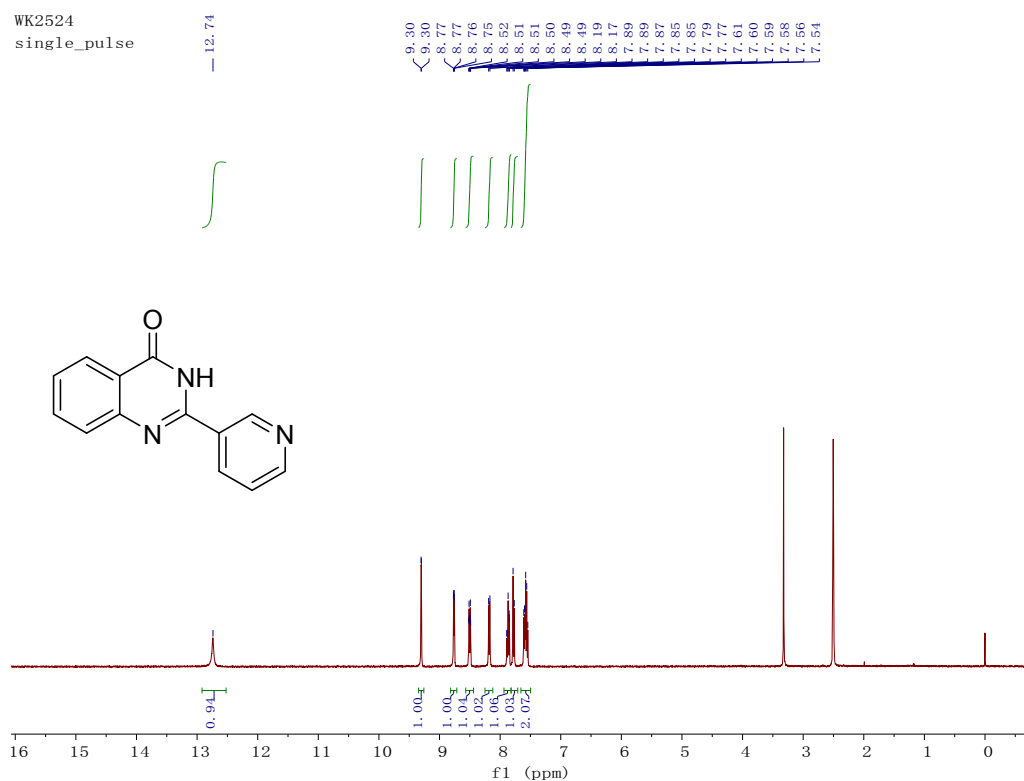

**<sup>1</sup>H NMR spectrum of 3o**

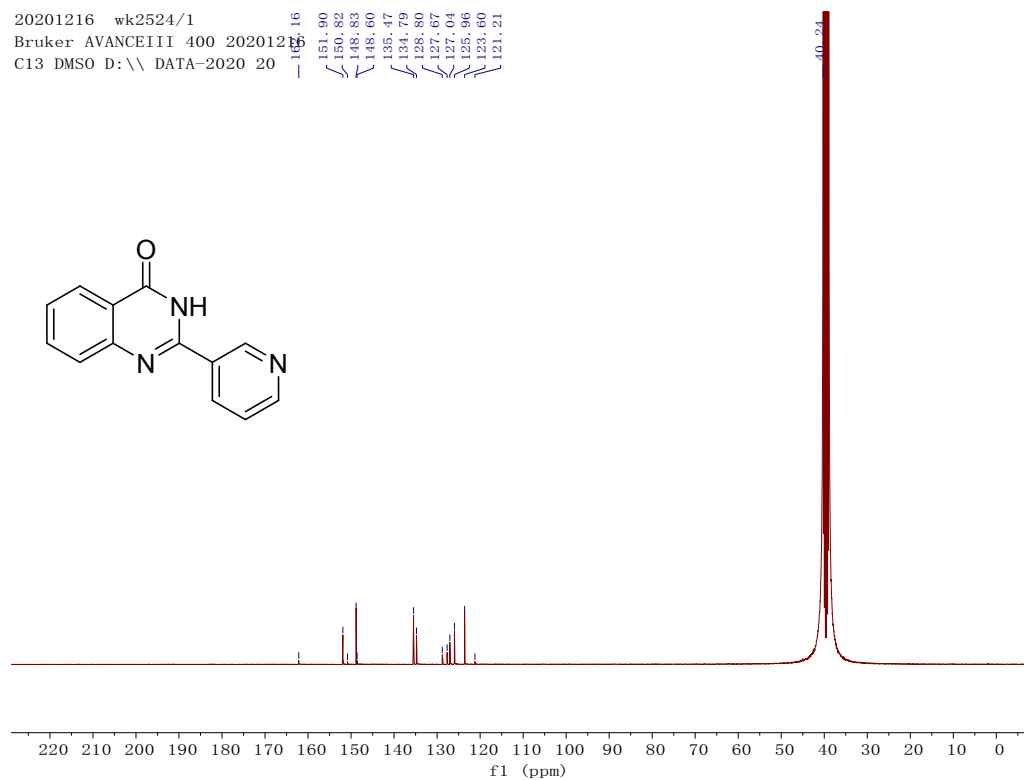

**<sup>13</sup>C NMR spectrum of 3o**

WK2517  
single\_pulse

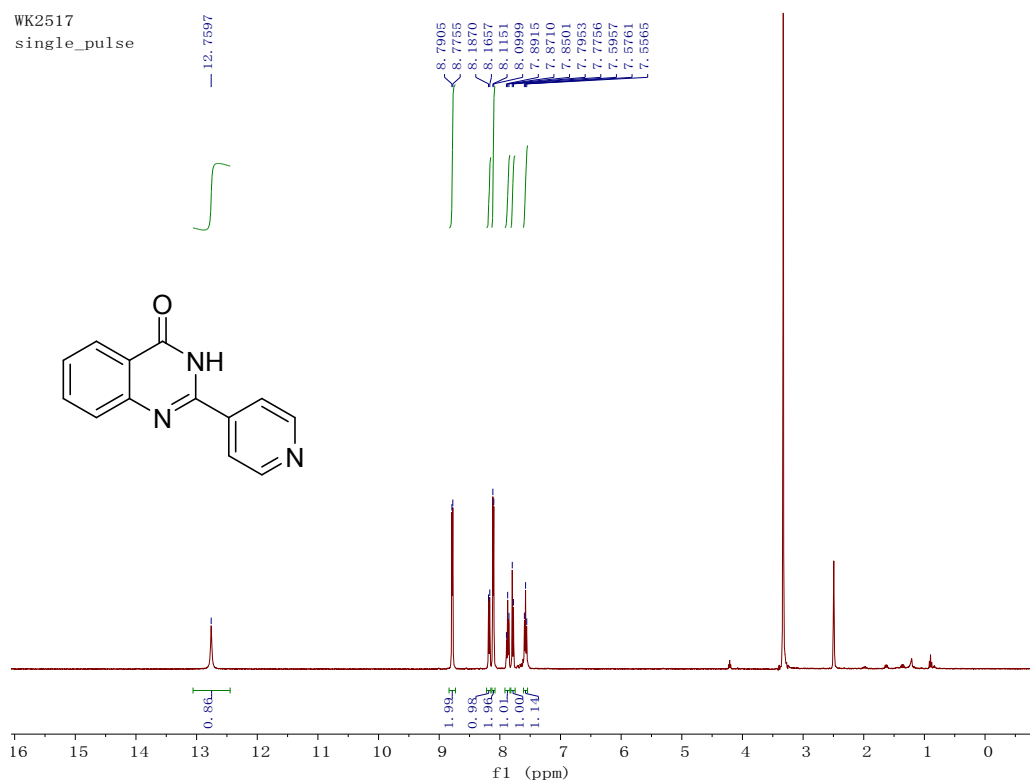

**<sup>1</sup>H NMR spectrum of 3p**

20210106 wk2517/1

Bruker AVANCEIII 400 20210106  
C13 DMSO D:\ DATA-2020 18

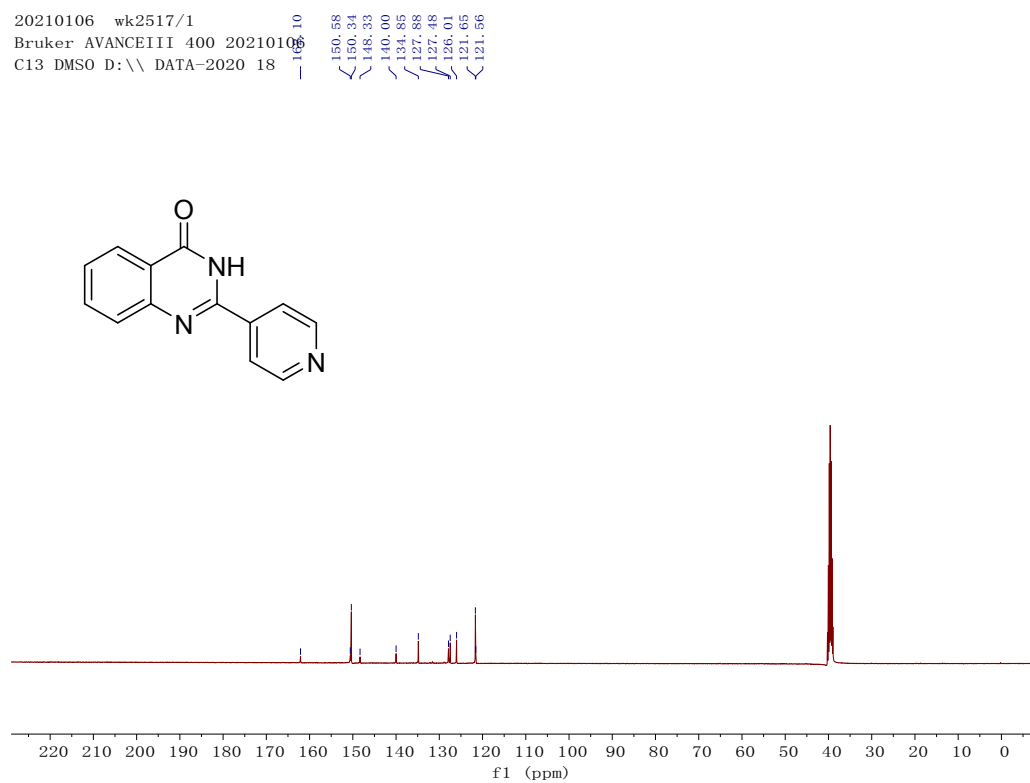

**<sup>13</sup>C NMR spectrum of 3p**

WK2537  
single\_pulse

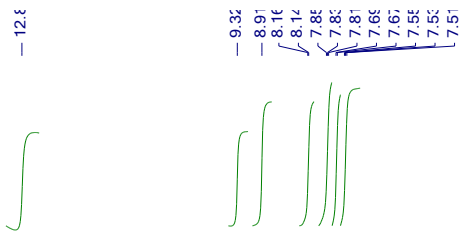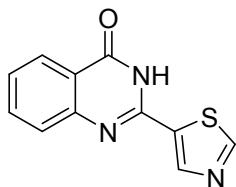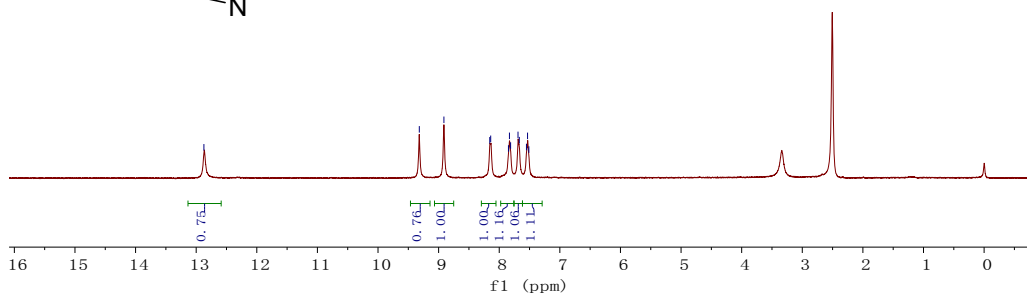

**<sup>1</sup>H NMR spectrum of 3q**

20210225 wk2537  
Bruker AVANCE III 400 20210225  
C13 DMSO D:\DATA-2021-33

159.50  
154.54  
151.47  
131.88  
133.90  
127.19  
126.97  
126.09  
121.14

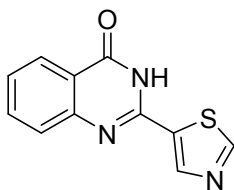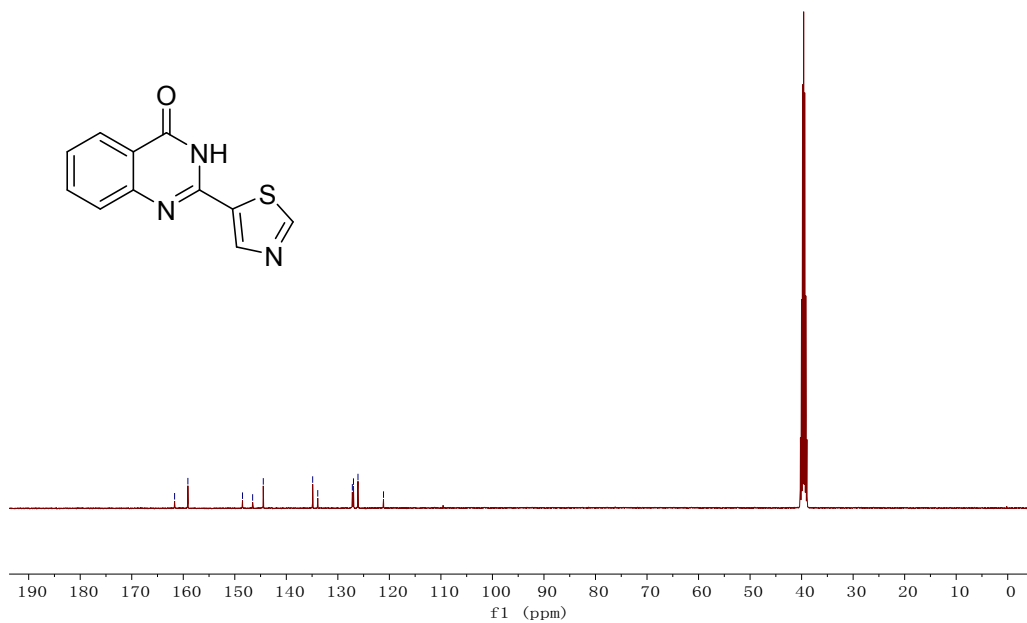

**<sup>13</sup>C NMR spectrum of 3q**

20200420 wk3638-2/12  
 Bruker AVANCEIII 400:20200420  
 PROTON2 DMSO D:\ DATA-2020 16

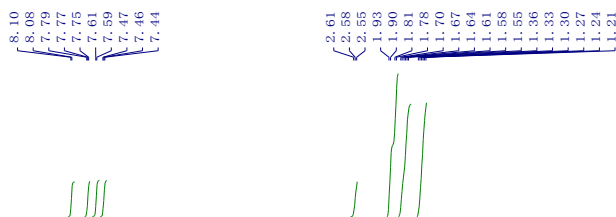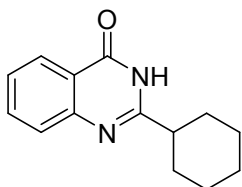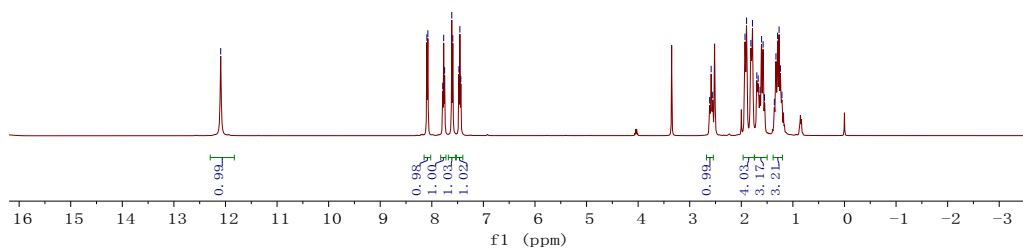

**<sup>1</sup>H NMR spectrum of 3r**

20200420 wk3638-2/2  
 Bruker AVANCEIII 400 20200420  
 C13 DMSO D:\ DATA-2020 16

162.97  
161.80  
149.01  
134.28  
127.04  
125.96  
125.72  
121.03  
42.90  
30.27  
25.59  
25.41

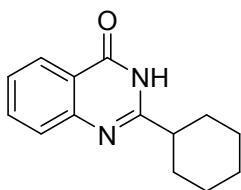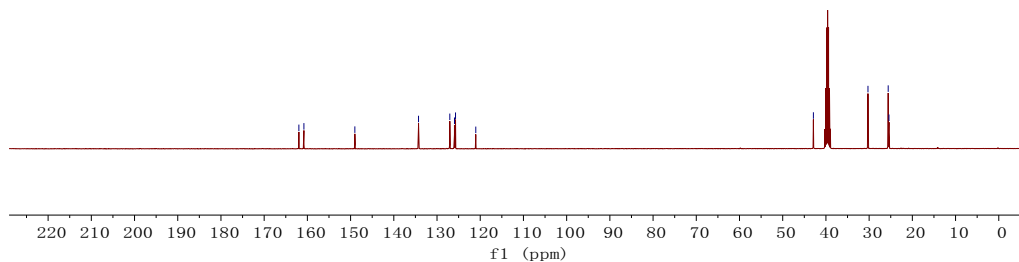

**<sup>13</sup>C NMR spectrum of 3r**

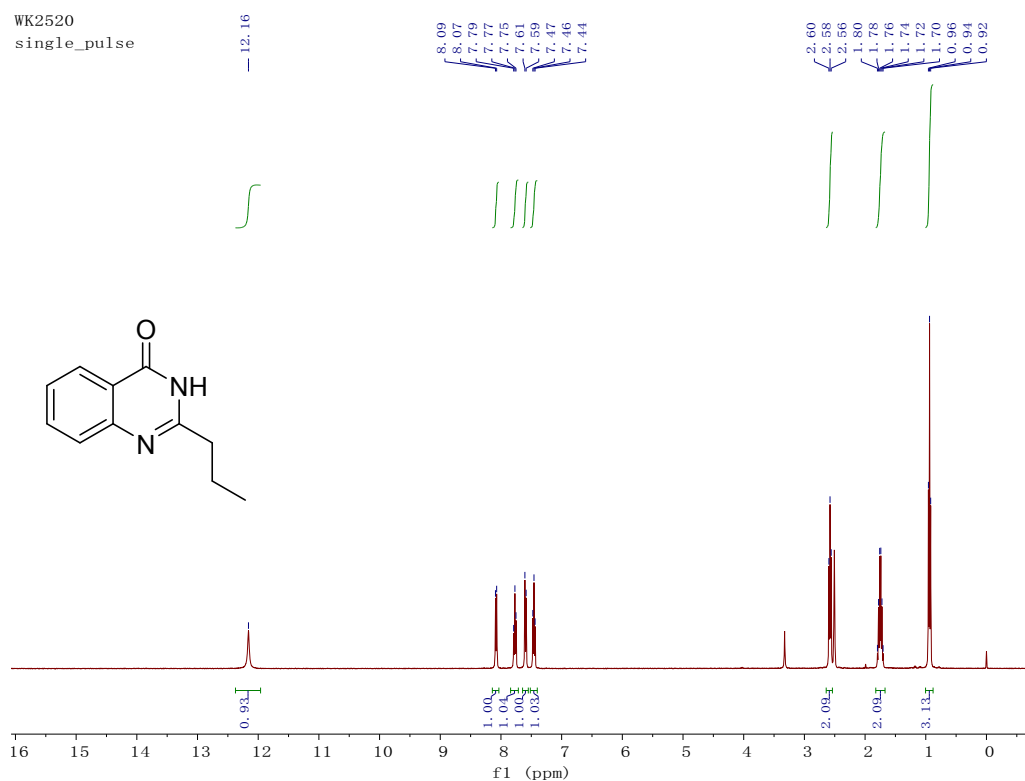

**<sup>1</sup>H NMR spectrum of 3s**

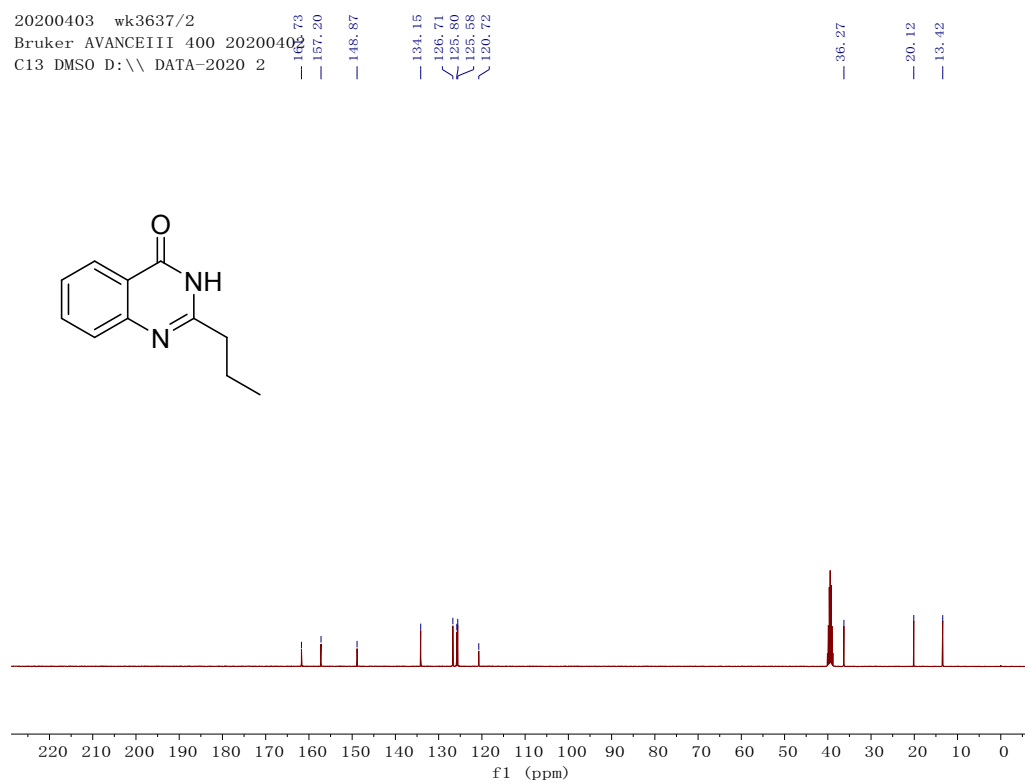

**<sup>13</sup>C NMR spectrum of 3s**



20200311 wk3639/1

Bruker AVANCEIII 400 20200310

PROTON2 DMSO D:\DATA-2020 52

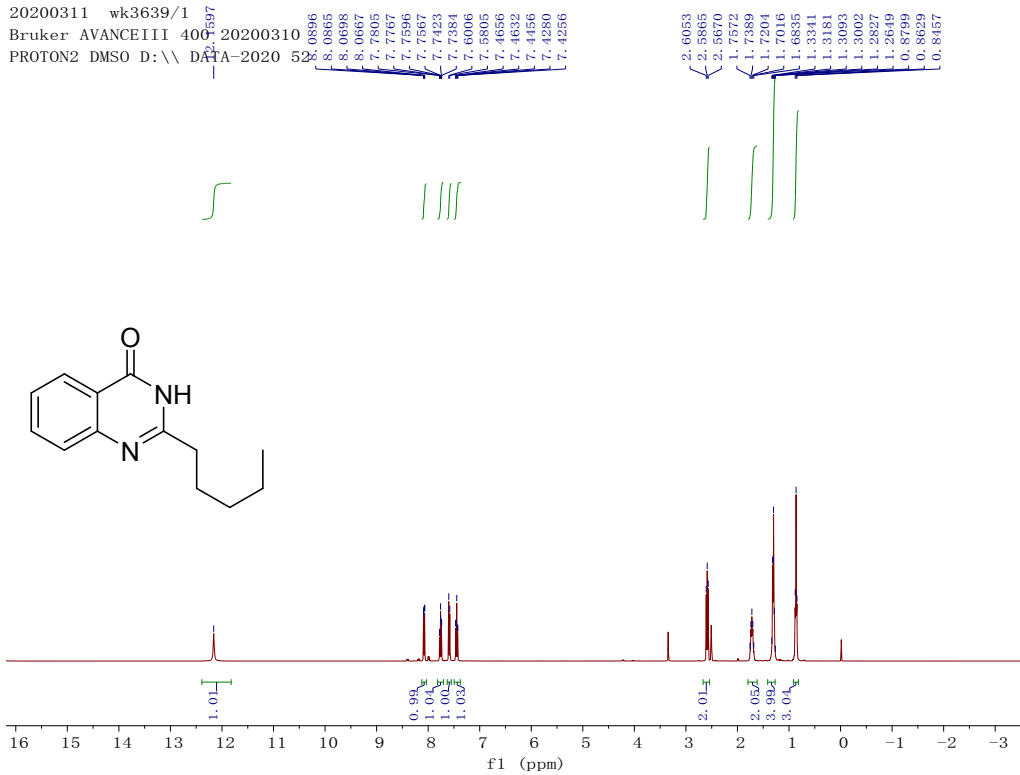

<sup>1</sup>H NMR spectrum of 3t

20200311 wk3639/2

Bruker AVANCEIII 400 20200310

C13 DMSO D:\DATA-2020 52

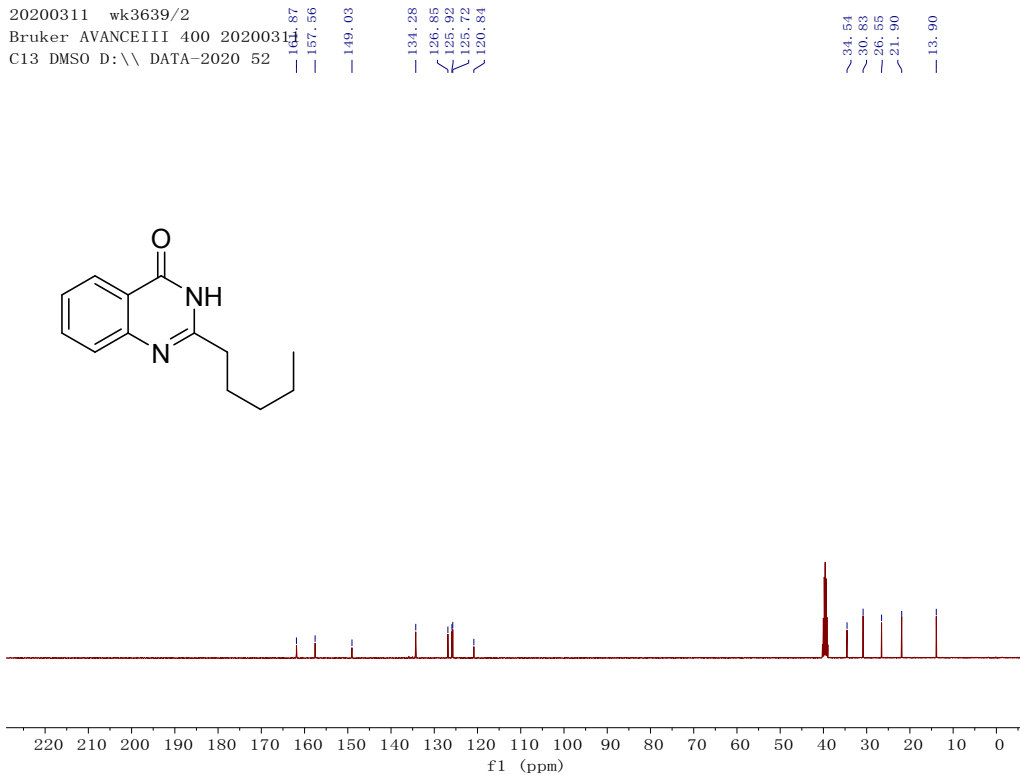

<sup>13</sup>C NMR spectrum of 3t

wk2519/1

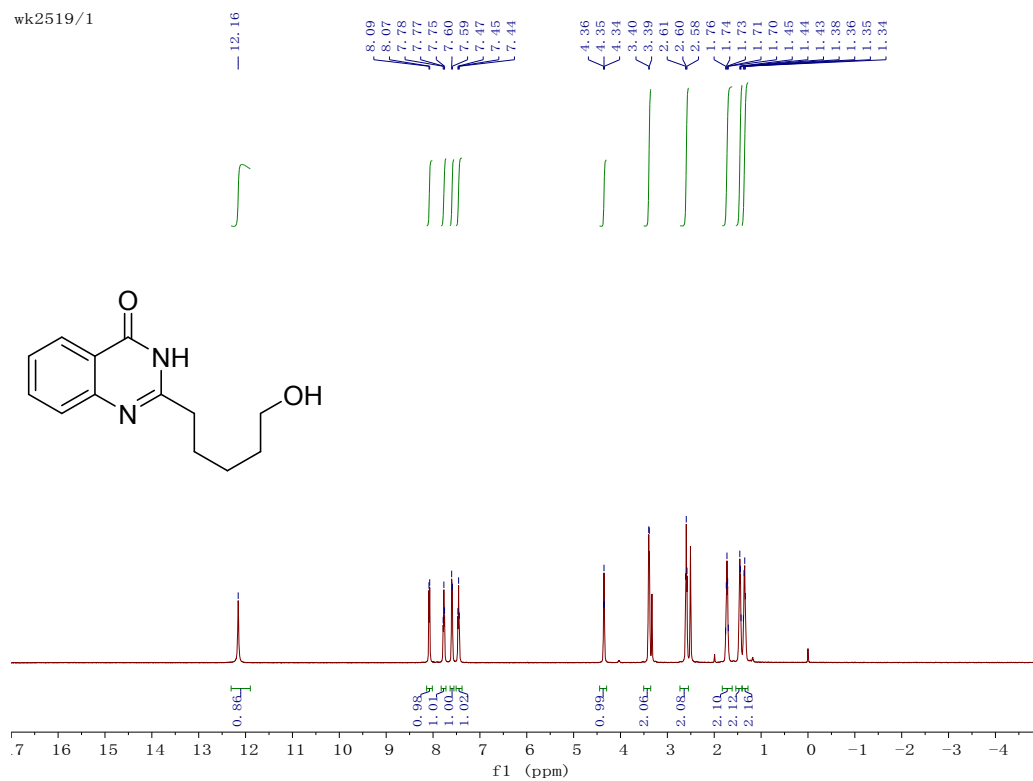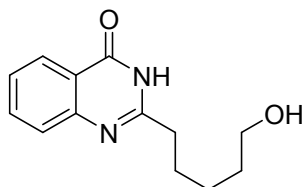

**<sup>1</sup>H NMR spectrum of 3u**

WK2519-C

single pulse decoupled gated NOE

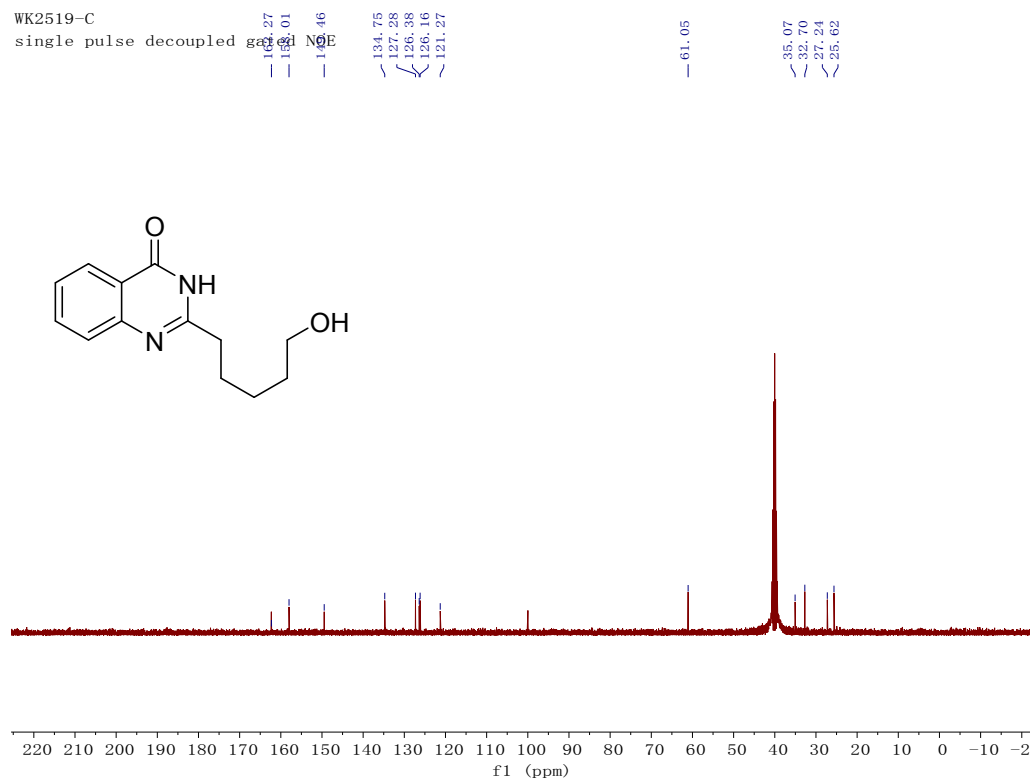

**<sup>13</sup>C NMR spectrum of 3u**

20200331 wk3702/1  
 Bruker AVANCEIII 400 20200331  
 PROTON2 DMSO D:\DATA-2020-17

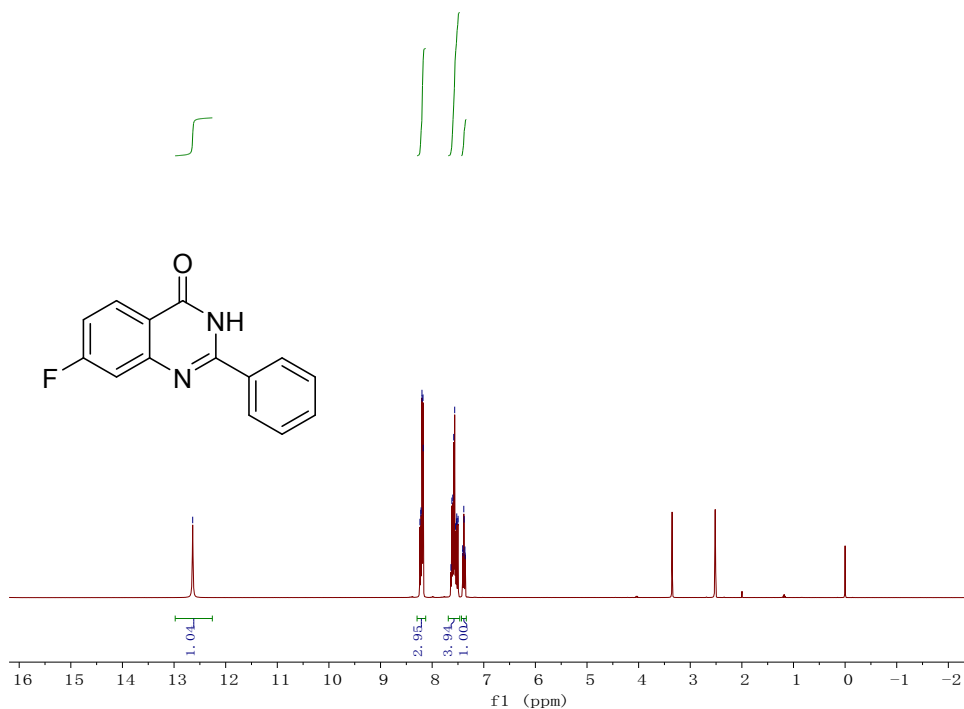

**<sup>1</sup>H NMR spectrum of 3bb**

20200401 wk3702/1  
 Bruker AVANCEIII 400 20200401  
 C13 DMSO D:\DATA-2020-10

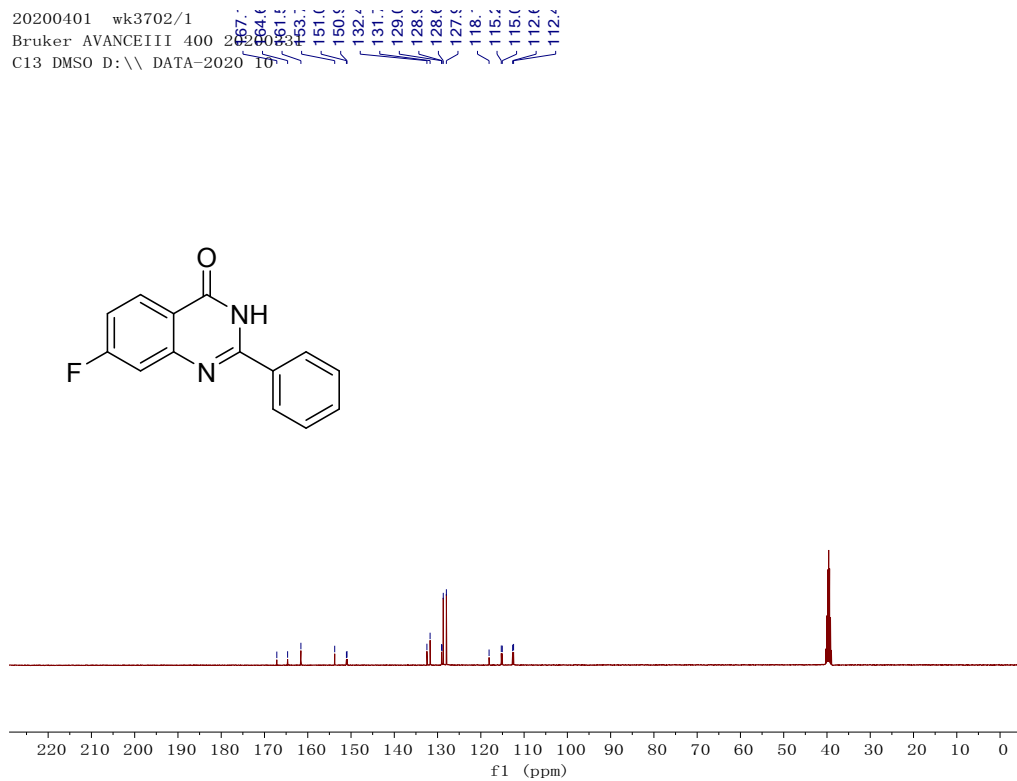

**<sup>13</sup>C NMR spectrum of 3bb**

20200331 wk3703/1  
Bruker AVANCEIII 400 20200331  
PROTON2 DMSO D:\ \ DATA-2020 18

8.18  
8.17  
7.84  
7.82  
7.81  
7.75  
7.73  
7.71  
7.60  
7.58  
7.56

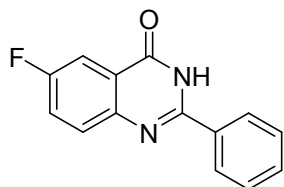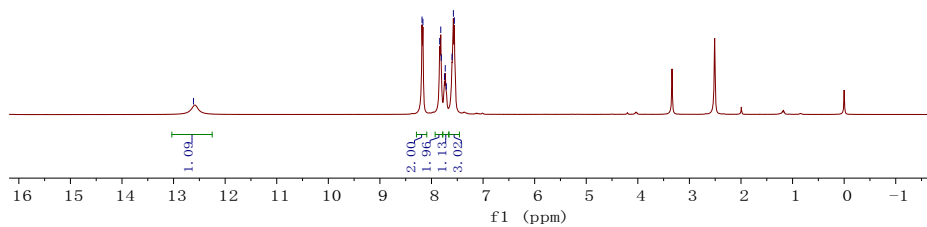

**<sup>1</sup>H NMR spectrum of 3bc**

20200401 wk3703/1  
Bruker AVANCEIII 400 20200331  
C13 DMSO D:\ \ DATA-2020 11

169.74  
161.26  
158.82  
151.93  
145.72  
132.62  
131.48  
130.32  
128.67  
127.81  
123.24  
123.00  
122.70  
122.21  
110.69  
110.46

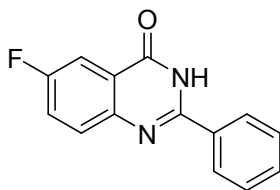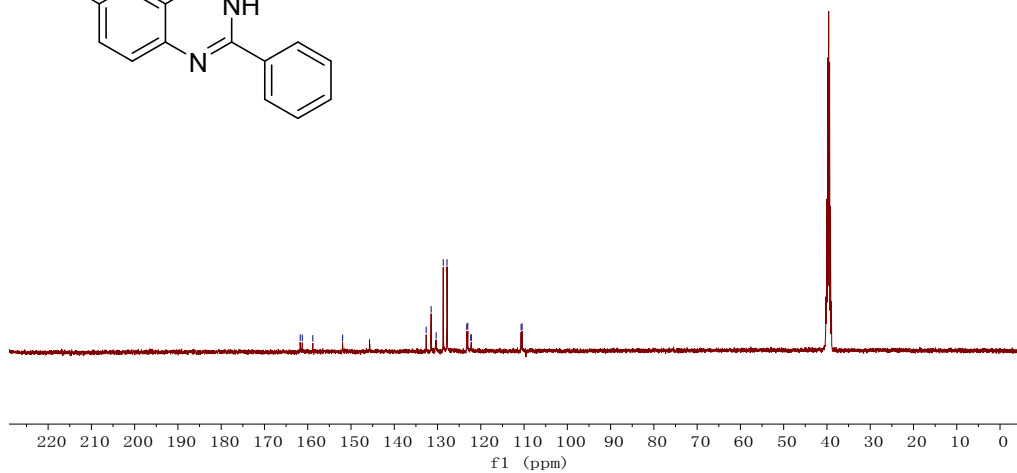

**<sup>13</sup>C NMR spectrum of 3bc**

20200429 wk3704b/1  
 Bruker AVANCEIII 400 20200429  
 PROTON2 DMSO D:\DATA-2020 17

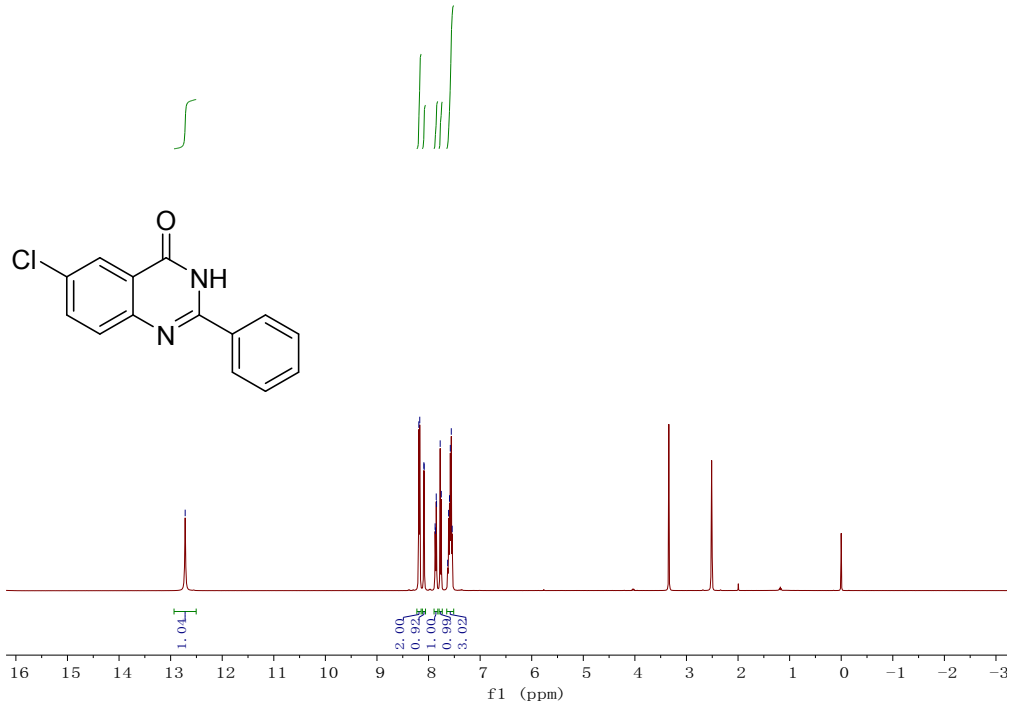

**<sup>1</sup>H NMR spectrum of 3bd**

20200429 wk3704b/2  
 Bruker AVANCEIII 400 20200429  
 C13 DMSO D:\DATA-2020 17

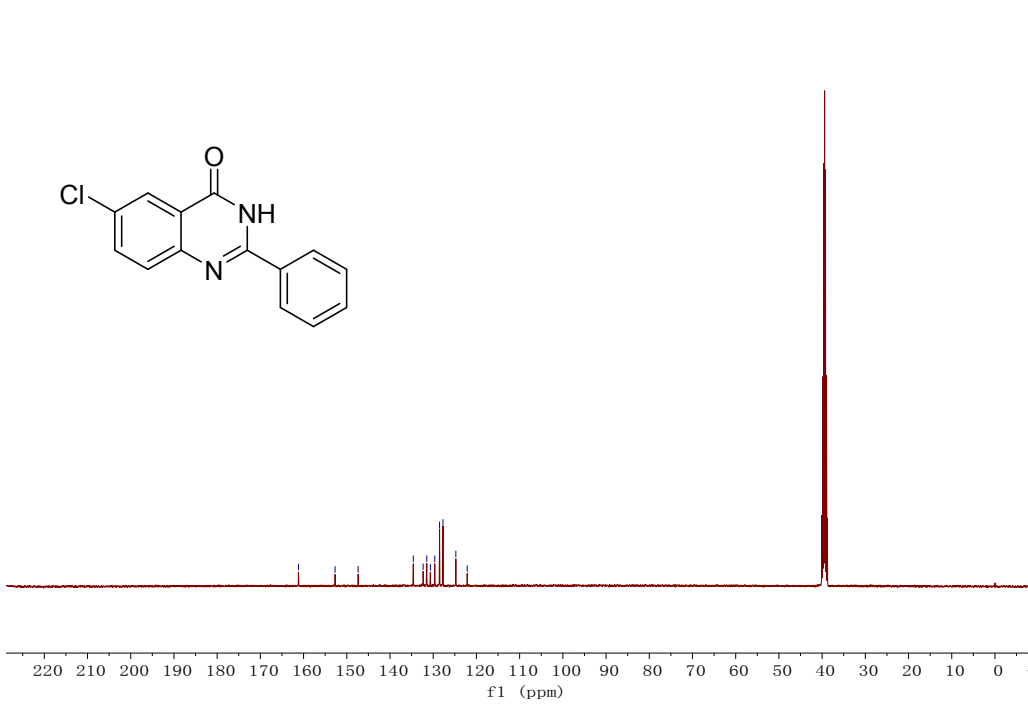

**<sup>13</sup>C NMR spectrum of 3bd**

20200403 wk3705/15  
Bruker AVANCEIII 400 20200402  
PROTON2 DMSO D:\ \ DATA-2020 3

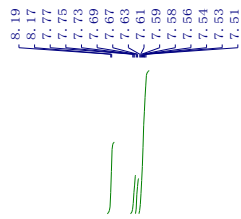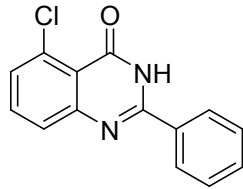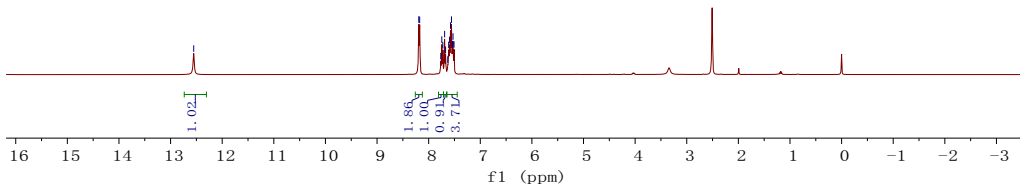

**<sup>1</sup>H NMR spectrum of 3be**

20200403 wk3705/2  
Bruker AVANCEIII 400 20200402  
C13 DMSO D:\ \ DATA-2020 3

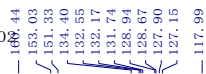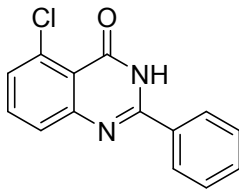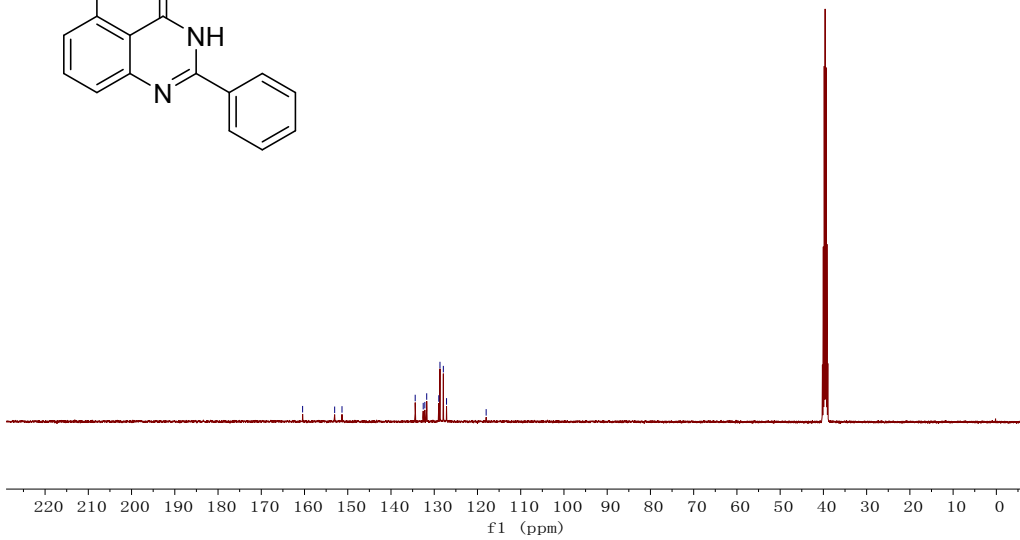

**<sup>13</sup>C NMR spectrum of 3be**

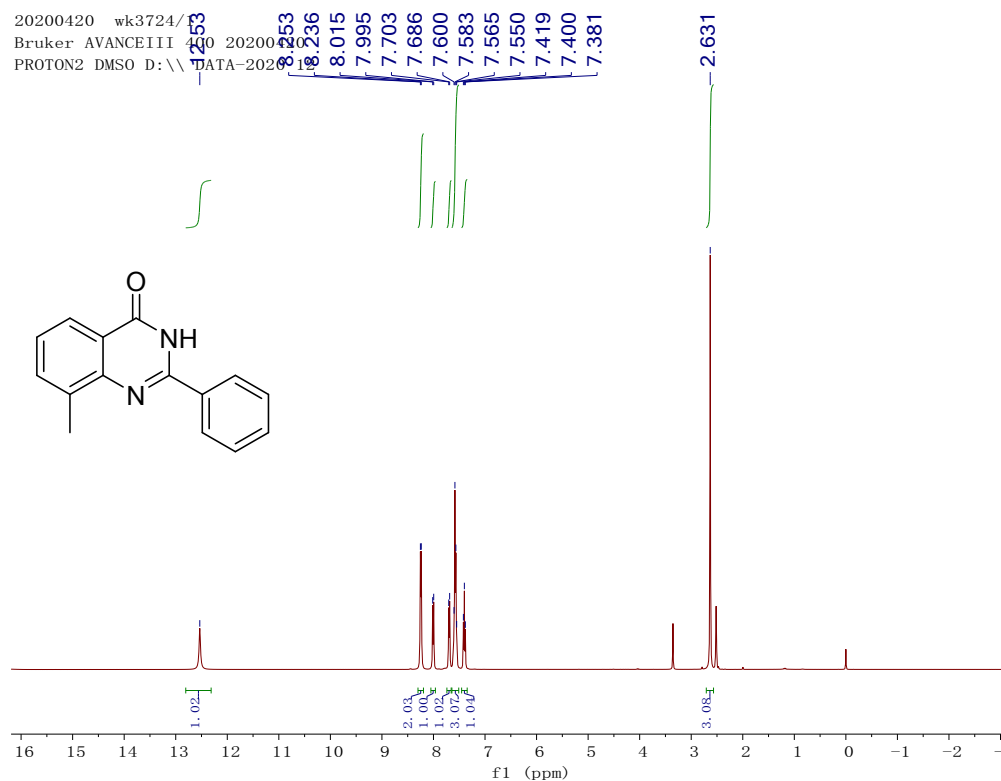

**<sup>1</sup>H NMR spectrum of 3bf**

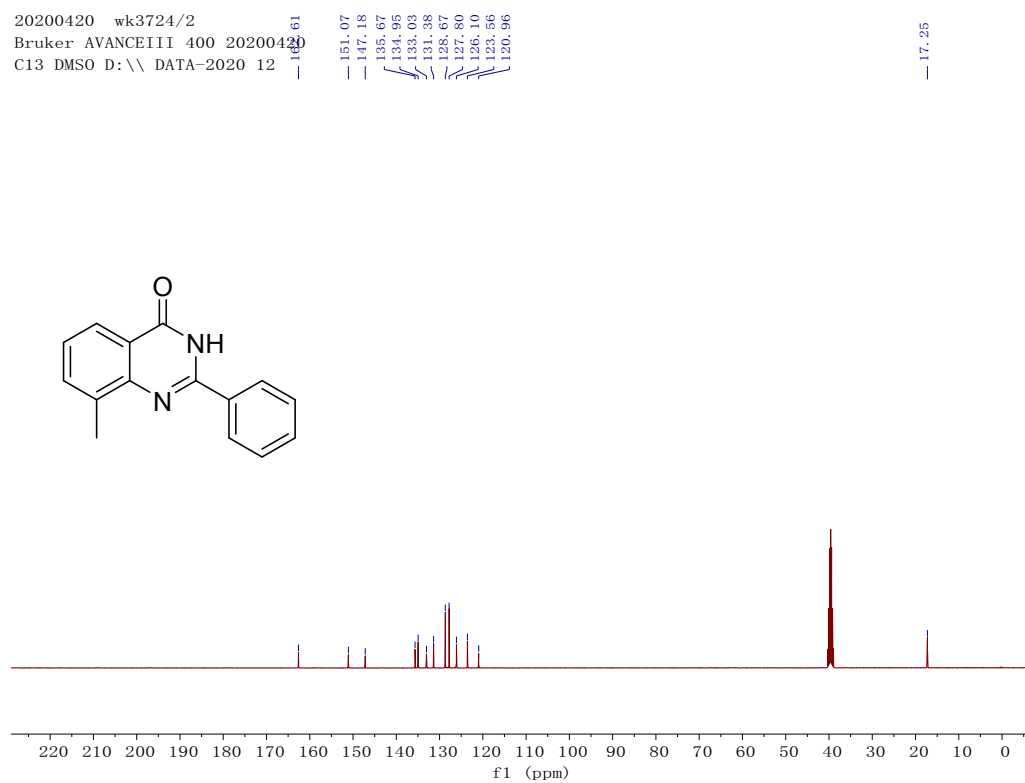

**<sup>13</sup>C NMR spectrum of 3bf**

wk2533/1

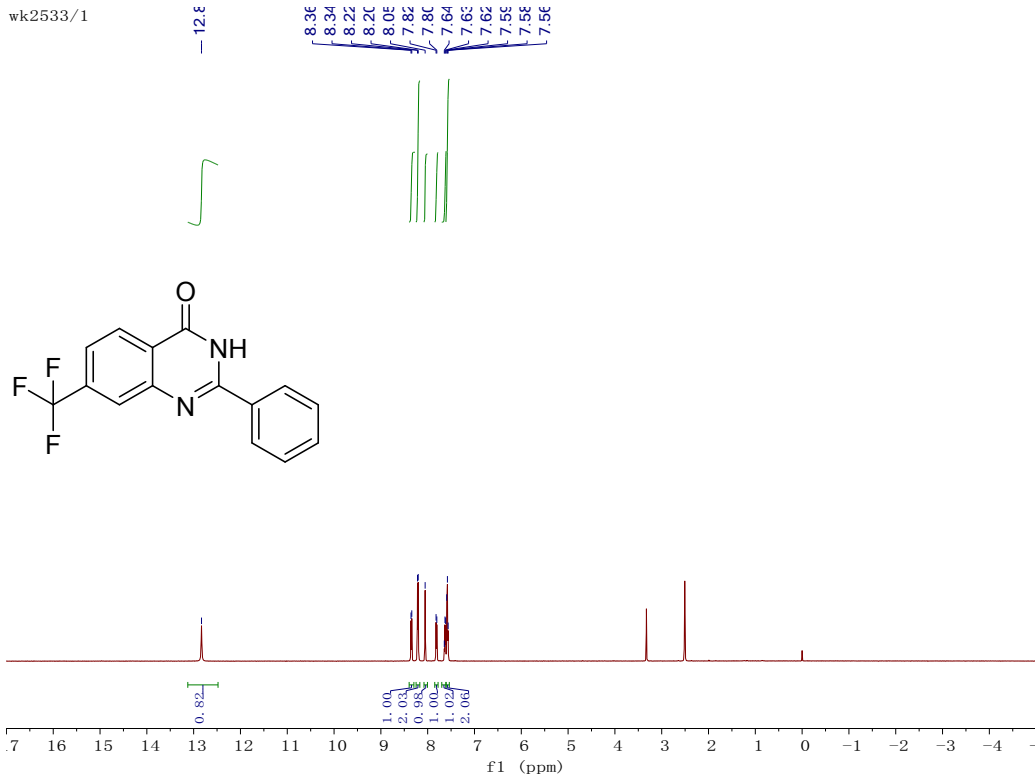

<sup>1</sup>H NMR spectrum of 3bg

20210105 wk2533/1

Bruker AVANCEIII 400 20210105

C13 DMSO D:\ DATA-2020 7

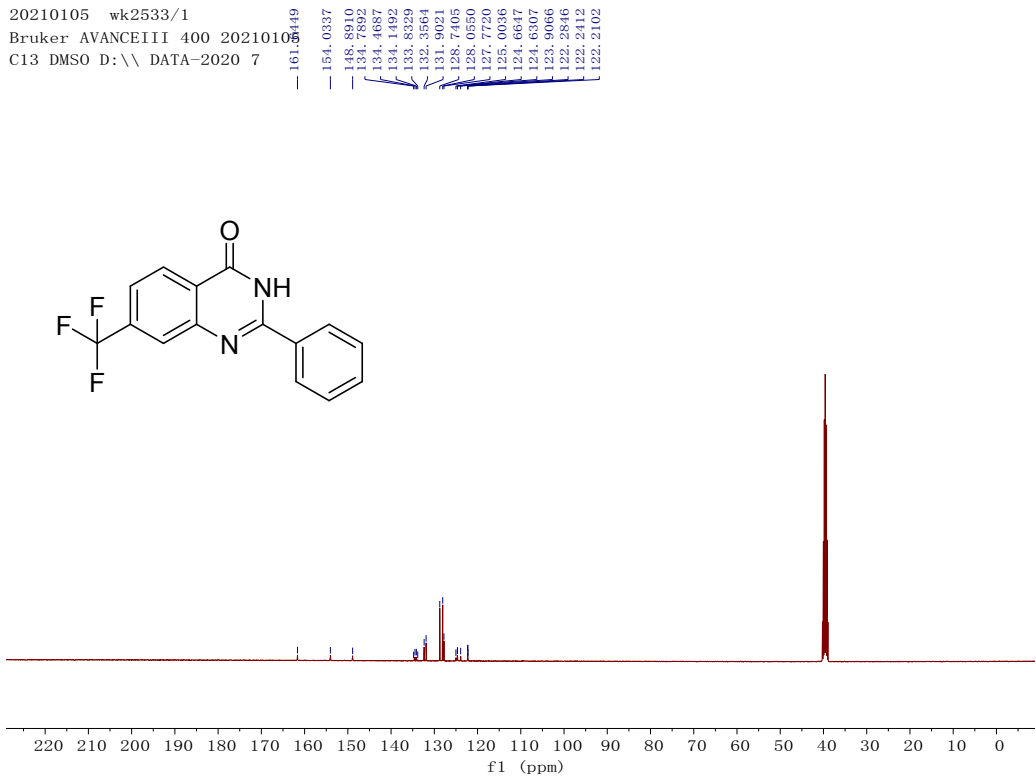

<sup>13</sup>C NMR spectrum of 3bg



20200403 wk3727/1  
 Bruker AVANCEIII 400 20200402  
 PROTON2 DMSO D:\ DATA-2020 11

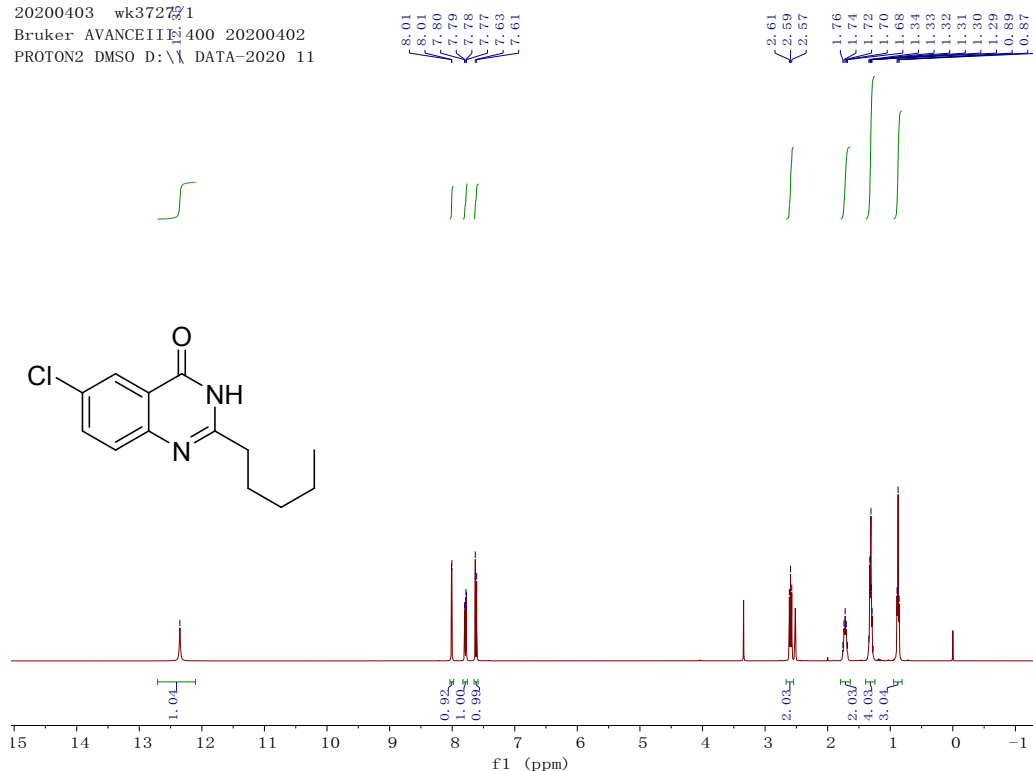

**<sup>1</sup>H NMR spectrum of 3bh**

20200403 wk3727/2  
 Bruker AVANCEIII 400 20200402  
 C13 DMSO D:\ DATA-2020 11

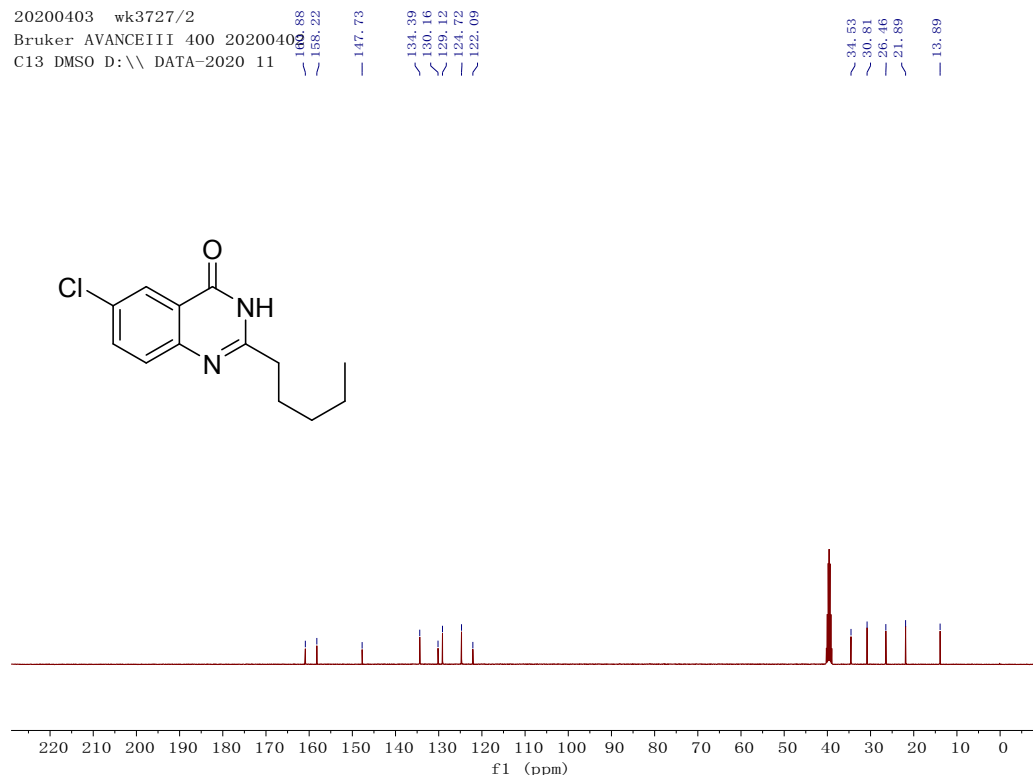

**<sup>13</sup>C NMR spectrum of 3bh**

20200403 wk3728/1  
 Bruker AVANCEIII 400 20200402  
 PROTON2 DMSO D:\ DATA-2020 12

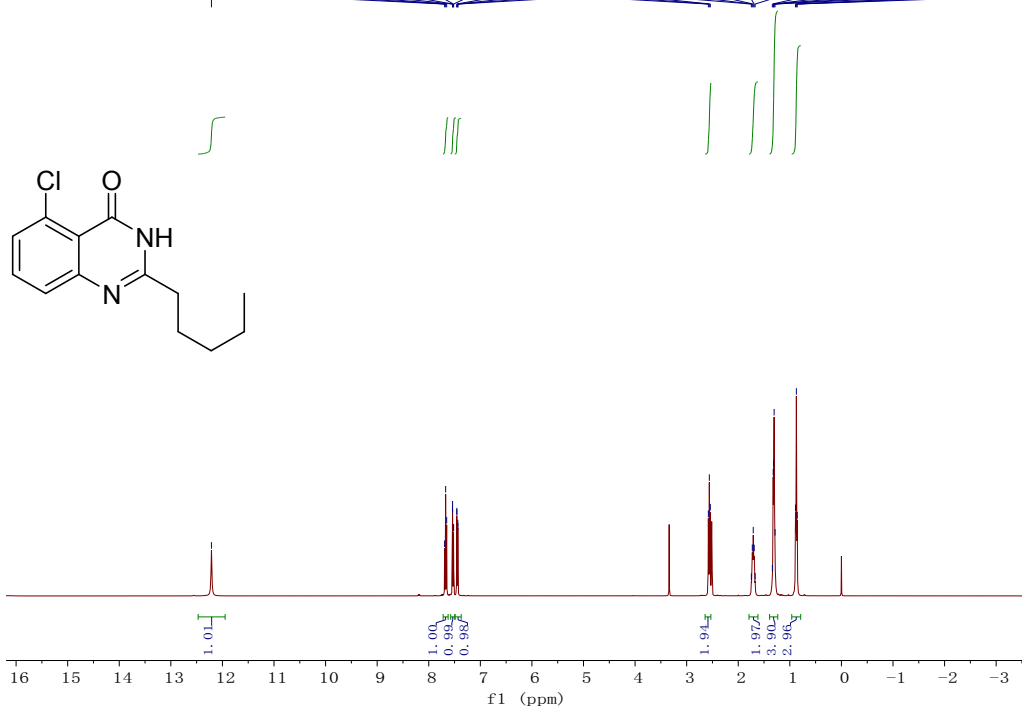

**<sup>1</sup>H NMR spectrum of 3bi**

20200403 wk3728/2  
 Bruker AVANCEIII 400 20200402  
 C13 DMSO D:\ DATA-2020 12

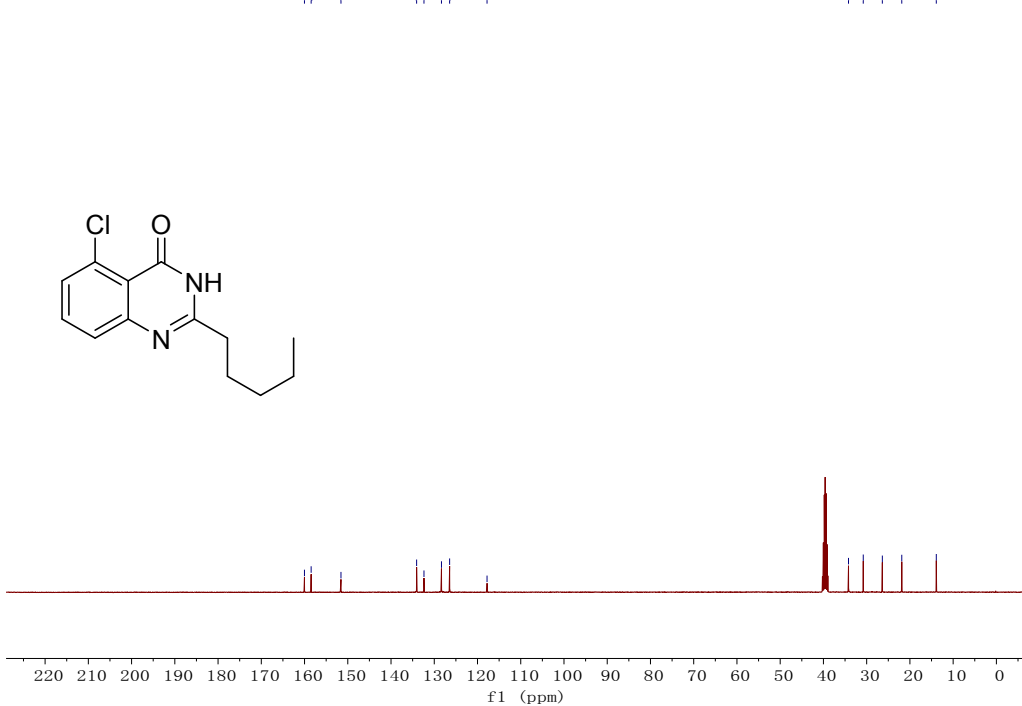

**<sup>13</sup>C NMR spectrum of 3bi**

20200420 wk3726/1  
 Bruker AVANCEIII 400 20200420  
 PROTON2 DMSO D:\ DATA-2020 18

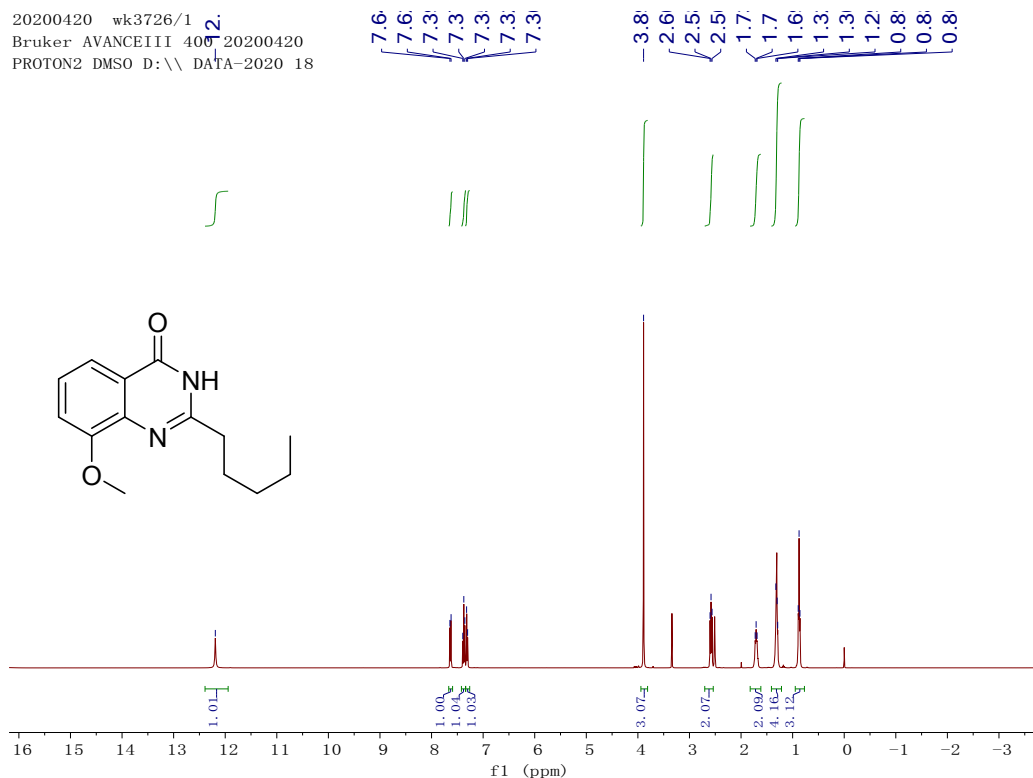

**<sup>1</sup>H NMR spectrum of 3bj**

20200420 wk3726/2  
 Bruker AVANCEIII 400 20200420  
 C13 DMSO D:\ DATA-2020 18

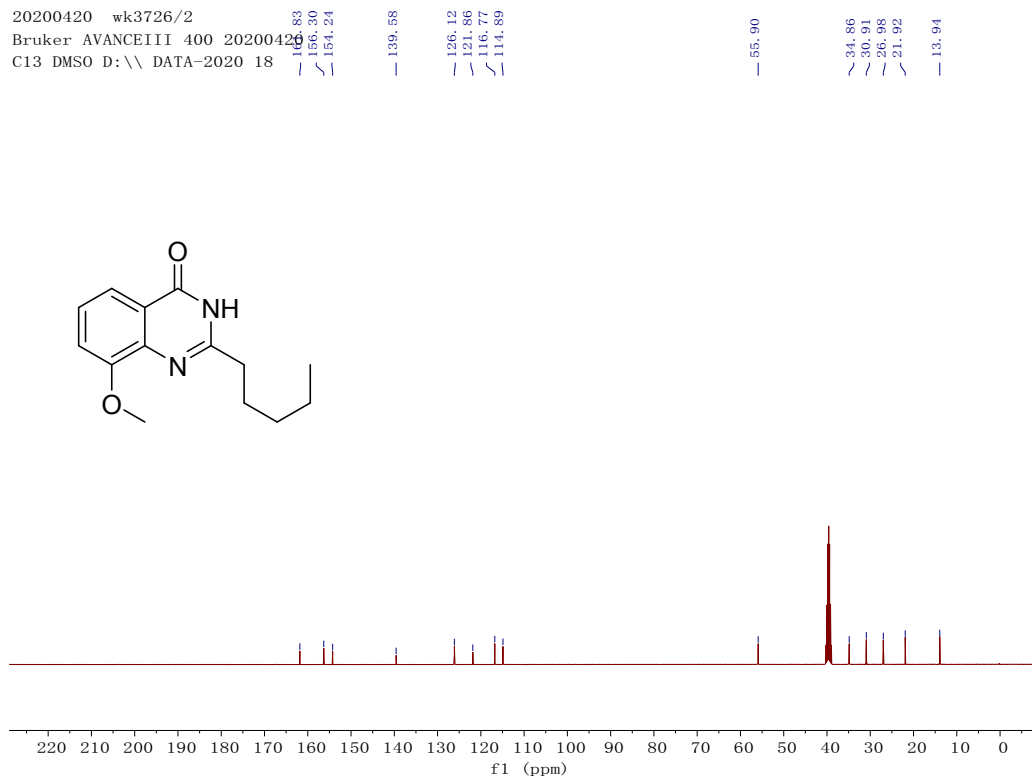

**<sup>13</sup>C NMR spectrum of 3bj**

20200420 wk3725/1  
 Bruker AVANCEIII 400 20200420  
 PROTON2 DMSO D:\ DATA-2020 21

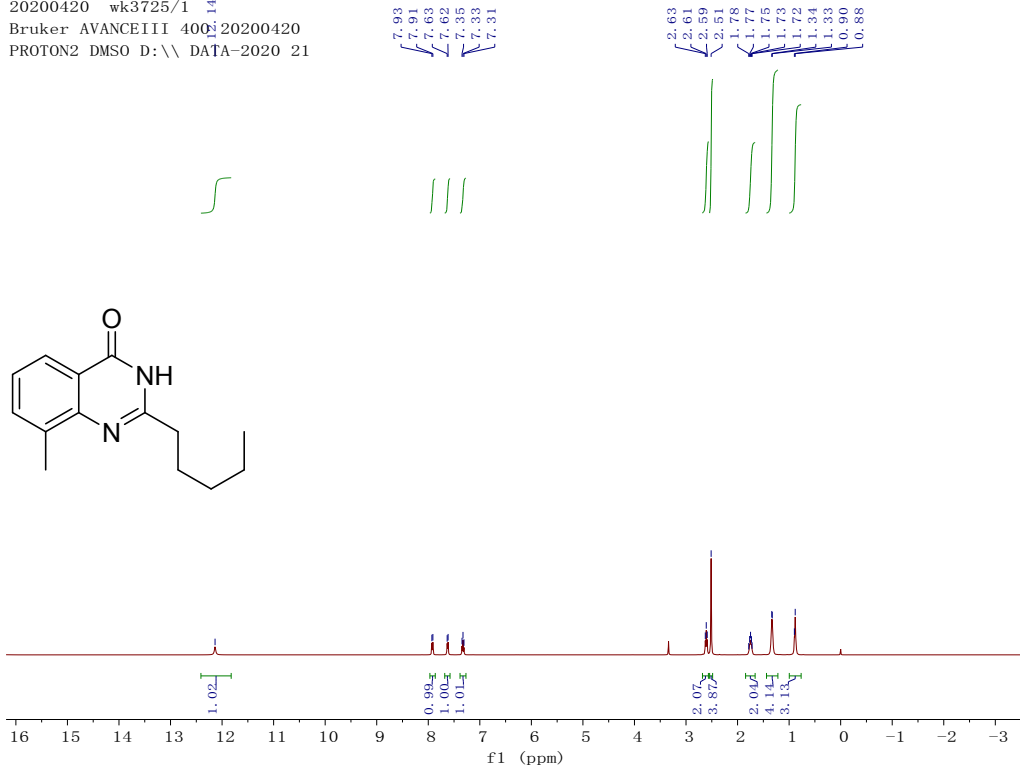

**<sup>1</sup>H NMR spectrum of 3bk**

20200420 wk3725/2  
 Bruker AVANCEIII 400 20200420  
 C13 DMSO D:\ DATA-2020 21

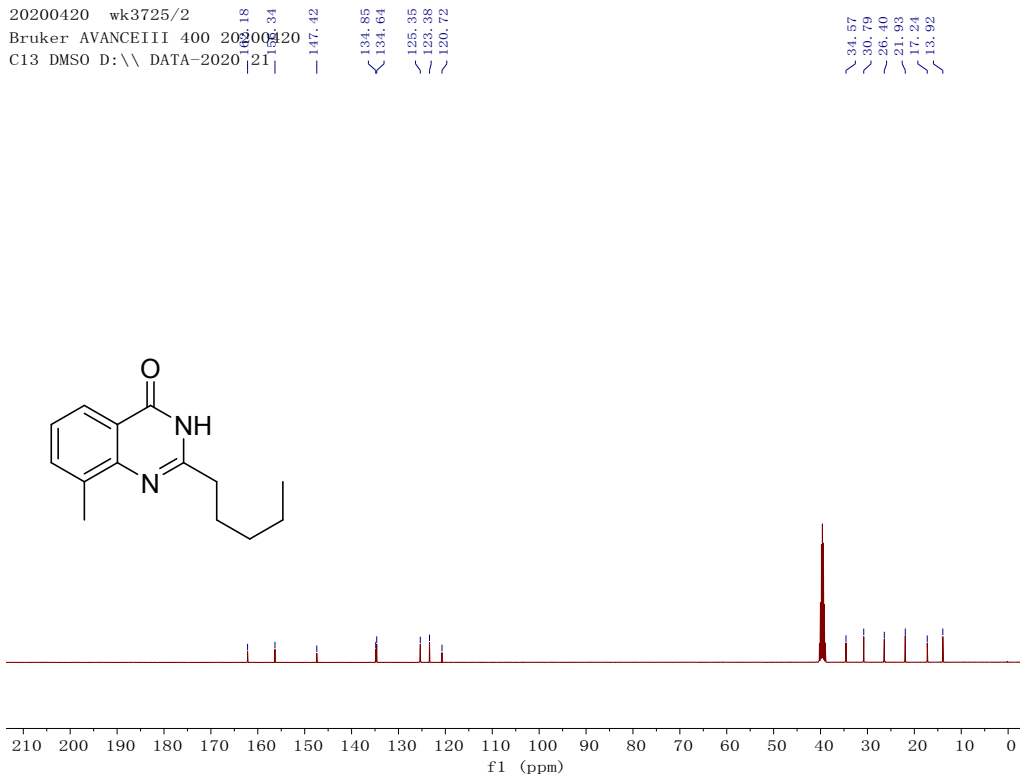

**<sup>13</sup>C NMR spectrum of 3bk**
